# Supplementary material for: Conflict of interest among Italian medical oncologists: a national survey
Source: PubMed Central journal article supplement — BMJ Open. 2018 Jun 30;8(6):e020912. doi: 10.1136/bmjopen-2017-020912 (PMC6042593; doi:10.1136/bmjopen-2017-020912), 2018-06-30
Supplement: bmjopen-2017-020912.draft_revisions.pdf [file bmjopen-2017-020912.draft_revisions.pdf]

# BMJ Open

BMJ Open is committed to open peer review. As part of this commitment we make the peer review history of every article we publish publicly available.

When an article is published we post the peer reviewers' comments and the authors' responses online. We also post the versions of the paper that were used during peer review. These are the versions that the peer review comments apply to.

The versions of the paper that follow are the versions that were submitted during the peer review process. They are not the versions of record or the final published versions. They should not be cited or distributed as the published version of this manuscript.

BMJ Open is an open access journal and the full, final, typeset and author-corrected version of record of the manuscript is available on our site with no access controls, subscription charges or pay-per-view fees (<http://bmjopen.bmj.com>).

If you have any questions on BMJ Open's open peer review process please email [info.bmjopen@bmj.com](mailto:info.bmjopen@bmj.com)

# BMJ Open

## Conflict of interest among Italian medical oncologists. A national survey

|                                 |                                                                                                                                                                                                                                                                                                                                                                                                                                                                                                                                                                                                                                                                                                                                                                                                                              |
|---------------------------------|------------------------------------------------------------------------------------------------------------------------------------------------------------------------------------------------------------------------------------------------------------------------------------------------------------------------------------------------------------------------------------------------------------------------------------------------------------------------------------------------------------------------------------------------------------------------------------------------------------------------------------------------------------------------------------------------------------------------------------------------------------------------------------------------------------------------------|
| Journal:                        | <i>BMJ Open</i>                                                                                                                                                                                                                                                                                                                                                                                                                                                                                                                                                                                                                                                                                                                                                                                                              |
| Manuscript ID                   | bmjopen-2017-020912                                                                                                                                                                                                                                                                                                                                                                                                                                                                                                                                                                                                                                                                                                                                                                                                          |
| Article Type:                   | Research                                                                                                                                                                                                                                                                                                                                                                                                                                                                                                                                                                                                                                                                                                                                                                                                                     |
| Date Submitted by the Author:   | 04-Dec-2017                                                                                                                                                                                                                                                                                                                                                                                                                                                                                                                                                                                                                                                                                                                                                                                                                  |
| Complete List of Authors:       | DeCensi, Andrea; E.O. Ospedali Galliera, S.C. Oncologia Medica; Wolfson Institute of Preventive Medicine<br>Numico, Gianmauro; Division of Medical Oncology, SS. Antonio e Biagio Hospital<br>Ballatori, Enzo; Medical Statistician, Spinetoli<br>Artioli, Fabrizio; Department of Oncology, Carpi and Mirandola Hospitals<br>Clerico, Mario; Department of Medical Oncology, Hospital of Biella; President, CIPOMO<br>Fioretto, Luisa; Department of Oncology, S.M. Annunziata Hospital<br>Livellara, Virginia; Division of Medical Oncology, Galliera Hospital<br>Ruggeri, Benedetta; Clinical Governance, Area Vasta 5, ASUR Marche<br>Tomirotti, Maurizio; CIPOMO Past President<br>Verusio, Claudio; Division of Medical Oncology, ASST Valleolona<br>Roila, Fausto; Division of Medical Oncology, Ospedale Santa Maria |
| <b>Primary Subject Heading</b>: | Ethics                                                                                                                                                                                                                                                                                                                                                                                                                                                                                                                                                                                                                                                                                                                                                                                                                       |
| Secondary Subject Heading:      | Oncology                                                                                                                                                                                                                                                                                                                                                                                                                                                                                                                                                                                                                                                                                                                                                                                                                     |
| Keywords:                       | conflict of interest, survey oncologist, physician industry relationship, cancer drug prices, ghost writing                                                                                                                                                                                                                                                                                                                                                                                                                                                                                                                                                                                                                                                                                                                  |
|                                 |                                                                                                                                                                                                                                                                                                                                                                                                                                                                                                                                                                                                                                                                                                                                                                                                                              |

SCHOLARONE™  
Manuscripts

Original Article: **Conflict of interest among Italian medical oncologists. A national survey.**

Andrea DeCensi<sup>1,2</sup>, Gianmauro Numico<sup>3</sup>, Enzo Ballatori<sup>4</sup>, Fabrizio Artioli<sup>5</sup>, Mario Clerico<sup>6</sup>, Luisa Fioretto<sup>7</sup>, Virginia Livellara<sup>1</sup>, Benedetta Ruggeri<sup>8</sup>, Maurizio Tomirotti<sup>9</sup>, Claudio Verusio<sup>10</sup> and Fausto Roila<sup>11</sup> on behalf of the Italian College of Chief Medical Oncologists (CIPOMO).

<sup>1</sup>Division of Medical Oncology, Galliera Hospital, Genoa, Italy;

<sup>2</sup>Wolfson Institute of Preventive Medicine, Queen Mary University of London, UK;

<sup>3</sup>Division of Medical Oncology, SS. Antonio e Biagio Hospital, Alessandria, Italy;

<sup>4</sup>Medical Statistician, Spinetoli, Ascoli Piceno, Italy;

<sup>5</sup>Department of Oncology, Carpi and Mirandola Hospitals;

<sup>6</sup>Department of Medical Oncology, Hospital of Biella, Italy; President, CIPOMO;

<sup>7</sup>Department of Oncology, S.M. Annunziata Hospital, Florence, Italy;

<sup>8</sup>Clinical Governance, Area Vasta 5, ASUR Marche, Italy;

<sup>9</sup>CIPOMO Past President;

<sup>10</sup>Division of Medical Oncology, ASST Valleolona, Saronno, Italy;

<sup>11</sup>Division of Medical Oncology, Ospedale Santa Maria, Terni, Italy.

**Running title:** Italian oncologists and conflict of interest

**Keywords:** conflict of interest; survey oncologist; physician industry relationship; cancer drug prices; ghost writing.

**Financial support:** The Italian College of Medical Oncology Chiefs (CIPOMO) supported online questionnaire set up but the content of the paper does not necessarily represent its view.

**Disclosure:** The authors indicate no potential conflict of interest

**Corresponding author:** Dr Andrea DeCensi, Division of Medical Oncology, E.O. Ospedali Galliera, Mura delle Cappuccine 14, Genoa, 16128, Italy; tel.: +39 0105634501; fax: +39 01057481090; e-mail: [andrea.decensi@galliera.it](mailto:andrea.decensi@galliera.it)

**Word count:** 3016

## ARTICLE SUMMARY

### ABSTRACT 300

#### Objective

To assess the Italian medical oncologist's opinion regarding the implications of conflict of interest (COI) on medical education, care and research and to evaluate their direct financial relationships.

#### Design

National survey conducted between March and April 2017 among Italian oncologists.

#### Setting

Online survey sponsored by the Italian College of Medical Oncology Chiefs through its web site.

#### Participants:

Italian oncologists who filled out an anonymous questionnaire including 19 items and individual and working characteristics.

#### Main outcome measures

The proportion of medical oncologists perceiving COI as an outstanding issue and those receiving direct payments from industry.

#### Results

The number of responders were 321, representing 13% of Italian tenured medical oncologists. Overall, 62% declared direct payments from pharmaceutical industry in the last 3 years. Sixty-eight percent felt the majority of Italian oncologists have a COI with industry but 59% suppose this is not greater than that of other specialties. Eighty-two percent consider that most oncology education is supported by industry. More than 75% believe that current allocation of industry budget on marketing and promotion rather than research and development is unfair but 75% consider appropriate to receive travel and lodging hospitality from industry. A median net profit margin of 5.000€ per patient enrolled in an industry trial was considered appropriate for the employee institution. Sixty percent agree to receive a personal fee for patients enrolled in industry trials but 79% state this should be reported in the informed consent. Over 90% believe that scientific societies should publish a financial report of industry support. Finally, 79% disagree to be co-author of an article written by a medical writer when no substantial scientific contribution is made.

1  
2  
3  
4  
5  
6  
7  
8  
9  
10  
11  
12  
13  
14  
15  
16  
17  
18  
19  
20  
21  
22  
23  
24  
25  
26  
27  
28  
29  
30  
31  
32  
33  
34  
35  
36  
37  
38  
39  
40  
41  
42  
43  
44  
45  
46  
47  
48  
49  
50  
51  
52  
53  
54  
55  
56  
57  
58  
59  
60

**Conclusions**

Among Italian oncologists COI is perceived as an important issue influencing costs, education, quality of care and science. A more careful policy on COI should be discussed.

For peer review only

## STRENGTHS AND LIMITATIONS OF THIS STUDY

- This is the first national survey ever performed by Italian oncologists and one of the few prompted by medical stakeholders on their conflict of interest and physician-industry relationships in Europe.
- The sample size of 321 is quite large, as it represents 13% of 2,260 tenured Italian certified medical oncologists from the 319 Units of the country, making the results of the survey generalizable.
- Another strength of the questionnaire is its anonymous form which favored the disclosure of financial relationships with industry and an open attitude by respondents, an unprecedented opportunity for transparency.
- The study has limitations, including the non-random selection of the respondents and the greater representation of chiefs of staff compared with the overall population of medical oncologists.

## INTRODUCTION

A conflict of interest (COI) exists when professional judgment concerning a primary interest such as patients' welfare or the validity of research may be influenced by a secondary interest such as financial gain or career advancement. Financial relationships between industry and physicians and/or researchers are common and may be direct, consisting of stock options, advisory fees, honoraria, speaking fees, travel and lodging expenses, or indirect, such as research support to researchers institutions. COI increasingly affects every aspect of medicine, including care, education, research integrity, patient trust, guideline formulation, regulatory approval and scientific prominence.<sup>1-7</sup>

Collaboration between industry and clinicians and/or researchers creates challenges and opportunities. While these relationships are essential to advancement to the field, there is a need to better understand the positive and negative consequences of COI and how best to report and manage it. Systematic reviews have found that pharmaceutical industry- sponsored studies are more often favorable to the sponsor's product compared with studies having other sources of sponsorship.<sup>4,5</sup> Public opinion on physician-pharmaceutical industry interactions differs depending on context and specific country health care models<sup>8,9</sup>, but some studies suggest a significant level of concern regarding interaction involving direct financial benefit to physicians.<sup>9,10</sup>

In medical oncology, financial relationships have increased through the years and have influenced clinical research, scientific prominence and visibility.<sup>11,12</sup> The issue is particularly important given the increasing volume of investments made by the pharmaceutical industry in cancer treatment.<sup>13</sup> In this escalating prize system<sup>14</sup>, pharmaceutical companies tend to spend much more for marketing and promotional activities than for research and development.<sup>15,16</sup> Evaluation of the clinical benefits that oncology drugs offer as a function of their cost has become complex and for some clinical

1  
2  
3 indications, health benefits are diminishing over time<sup>17</sup>, do not follow criteria of innovation<sup>18</sup>, and  
4  
5 provide increasing financial toxicity to patients.<sup>19</sup> There is concern that the substantial increase in  
6  
7 drug prices may hamper both the universal and private health care system sustainability in many  
8  
9 countries<sup>14, 20-22</sup> and is also of concern to top managers of pharmaceutical industries.<sup>23</sup>  
10

11  
12 The debate on COI has received attention in the US since the introduction of the Physician  
13  
14 Payments Sunshine Act (PPSA), which requires health care product manufacturers to report to the  
15  
16 federal government payments of more than \$10 to physicians. Bringing transparency, PPSA may  
17  
18 provide trustful patient physician relationships and medical professionalism, but has received mixed  
19  
20 opinions among physicians and experts in the field.<sup>24,25</sup> Conversely, little is known about the  
21  
22 opinion of medical stakeholders from universal health systems such as those in Europe. A recent  
23  
24 survey conducted in Italy showed that industry sponsorship of medical conferences is common,  
25  
26 while the presence of a structured regulatory system is not. Disclosure of industry funding to  
27  
28 medical societies was very limited.<sup>26</sup>  
29  
30

31  
32 To ascertain the Italian situation, we assessed the opinion of Italian medical oncologists on different  
33  
34 aspects and implications of COI in a national survey.  
35  
36  
37  
38  
39

## 40 **METHODS**

41  
42  
43 The Italian College of Medical Oncology Chiefs (CIPOMO) set up an online national survey of its  
44  
45 members. CIPOMO accounts for 184 chiefs of hospital oncology divisions/departments. Medical  
46  
47 oncologists working in research institutions and university hospitals do not belong to CIPOMO but  
48  
49 were not excluded from the survey. Members of CIPOMO were invited to complete the online  
50  
51 survey and spread the survey among their collaborators with the intent to also involve young  
52  
53 collaborators.  
54  
55  
56  
57



1  
2  
3 The questionnaire was authored by three members of CIPOMO and reviewed by eight members of  
4 the CIPOMO board of directors. After approval, the questionnaire was written using the  
5 “SurveyMonkey” platform ([www.surveymonkey.com](http://www.surveymonkey.com)) and presented on line from March 1 to April  
6  
7  
8  
9 15, 2017. CIPOMO members were reminded to complete the survey through three repeated email  
10  
11 messages. Completion of the survey was anonymous although baseline information (country area,  
12  
13 age, sex, duration of oncology experience, type of institution and position) was requested before  
14  
15 proceeding.

16  
17  
18 The survey was composed of 19 questions investigating feelings, opinions and experience of the  
19  
20 respondents on different aspects of COI (Figure 1, table 4 and text). These include the following  
21  
22 areas: the influence of COI in medical oncology and drug pricing; influence of the drug industry on  
23  
24 continuous medical education; the percentage of direct payments from industry; the acceptability of  
25  
26 travel and lodging coverage by the industry and per patient fee for clinical trials and its disclosure in  
27  
28 the informed consent; the payment amount of per patient fee to the institution for a trial; the role of  
29  
30 disclosure as a deterrent of COI; the influence of COI on scientific societies; the influence of COI  
31  
32 on drug prescription; the opinion on ghost writing in scientific articles.

33  
34  
35  
36  
37 Respondents were requested to quantify in a 4-point Likert scale the extent to which they agreed  
38  
39 with the proposed questions or statements. In the analysis, 17 answers were grouped to facilitate  
40  
41 understanding of results (i.e., “strongly agree” plus “agree” *versus* “strongly disagree” plus  
42  
43 “disagree”). One item on net profit margin led to an answer as a continuous variable, whereas  
44  
45 another item on direct payment was dichotomized (Yes, No).

### 46 47 48 **Statistical analysis**

49  
50  
51 Answers were collected by the online platform and transformed in a data sheet for analysis. Usual  
52  
53 descriptive statistics were used to show both the respondent characteristics and the general results.  
54  
55 Moreover, an exploratory analysis for subgroups was performed considering the following  
56  
57

1  
2  
3 explicative variables: geographic area (north, center, south), sex (male, female), age (< 45, 45-59, ≥  
4 60 years), place of work (hospital, university, research institute, other), nature of institution (public,  
5 private), job position (assistant chief, chief, other), years of oncology experience (< 15, ≥ 15), direct  
6 payment from industry in the last 3 years (No, Yes). All answers to the questionnaire items were in  
7 turn used as dependent variables. Due the explorative purpose of analysis, no adjustment for the  
8 Bonferroni's inequality was made. Given the cross-sectional study nature where the responders  
9 were not randomly chosen, bidirectional chi-square tests assuming alpha=0.05 as significance level  
10 were calculated to provide a measure of the strength of association and not with inferential  
11 purposes.  
12  
13  
14  
15  
16  
17  
18  
19  
20  
21  
22  
23  
24  
25

## 26 RESULTS

27  
28  
29 The responders were 321, from all 20 Italian regions, representing 13% of 2,260 tenured Italian  
30 certified medical oncologists from the 319 Units of the country, according to the White Book of the  
31 Italian Association of Medical Oncology.<sup>27</sup> The respondent characteristics are summarized in Table  
32 1. They reflect the main characteristics of the Italian population of oncologists, with the majority of  
33 them employed in northern Italy, having equal sex distribution, a third being aged 45 years or  
34 younger and working predominantly in public hospitals. However, there was a greater proportion of  
35 chiefs of staff because of the nature of the study sponsor.  
36  
37  
38  
39  
40  
41  
42  
43  
44

45 The questionnaire and answers concerning the COI are described in Figure1. Over two- thirds  
46 (68%) believe the majority of Italian oncologists have a COI with industry. A subgroup analysis  
47 indicates a greater proportion of believers among females, younger physicians, assistant chiefs and  
48 those who did not receive payments from industry in the last 3 years ( $p < 0.05$ , table 2). However,  
49 59% assume the COI in oncology is not greater than in other medical specialties.  
50  
51  
52  
53  
54  
55  
56  
57  
58  
59  
60

1  
2  
3 Overall, 62% declared general payments from the pharmaceutical industry in the last 3 years, with a  
4 significantly greater proportion among those living in southern Italy, males, oncologists working in  
5 research institutes and chiefs of staff ( $p<0.05$ , table 3).  
6  
7

8  
9  
10 Eighty-one percent believe that most oncology education is supported by industry, with a greater  
11 proportion among older physicians and chiefs of staff ( $p<0.05$ ), but over 70% think their continuous  
12 medical education (CME) should be supported by their institution or public sources and only less  
13 than 10% and 20% think it should be paid for by themselves or the industry, respectively (Table 4).  
14  
15  
16 The vast majority stated their first CME tool is scientific journals (89%), but 14% use  
17 pharmaceutical representatives as the main CME method.  
18  
19  
20  
21  
22

23  
24 Furthermore, 54% of the medical oncologists consider inappropriate to organize a scientific meeting  
25 within his/her facility with an opinion leader chosen by a pharmaceutical company, especially in the  
26 north and among the chiefs of staff ( $p<0.05$ ).  
27  
28  
29

30  
31 About 77% believe that the greater allocation of budget put by industry on marketing and  
32 promotion relative to research and development is inappropriate, with a greater proportion of  
33 supporters among younger physicians and non-chiefs of staff ( $p<0.05$ ), but 75% of all respondents  
34 consider it appropriate to receive travel and lodging hospitality from industry to attend international  
35 meetings, with a significantly greater proportion of supporters among those receiving direct  
36 industry payments ( $p<0.05$ ).  
37  
38  
39  
40  
41  
42  
43

44  
45 A median net profit margin of 5,000€ (mean $\pm$ SD=9,888 $\pm$ 10,414€) per patient enrolled in a trial was  
46 considered an appropriate amount for the investigator's institution, although the distribution had a  
47 long tail towards higher values.  
48  
49

50  
51  
52 Sixty percent would agree to receive a personal fee for each patient enrolled in an industry  
53 sponsored trial, with a greater proportion among those who received payments from industry  
54 ( $p<0.05$ ), but 79% state this should be reported in the patient's informed consent.  
55  
56  
57

1  
2  
3 Nearly 60% think that disclosing a COI with different companies who are competitors is not a  
4  
5 guarantee of impartiality and 71% believe that COI disclosure does not attenuate the risk of  
6  
7 scientific bias. However, 48% of those working in private institutions *versus* 27% of those working  
8  
9 in public institutions believe that COI disclosure attenuates the problem ( $p<0.05$ ).  
10

11  
12 Over 90% believe that scientific societies should have a COI policy and that a detailed report of the  
13  
14 financial support by the industry should be published annually. A total of 58% believe that industry  
15  
16 support does not influence topic selection in meetings and 61% believe that giving an invited  
17  
18 speech by industry does not influence their drug prescription. However, a higher proportion of male  
19  
20 and older physicians feel that prescription is influenced by direct industry payments ( $p<0.05$ ).  
21  
22

23  
24 Finally, 79% see as unfair to being co-author of an article written by a medical writer for an  
25  
26 industry-sponsored trial when no substantial scientific contribution is made. However, 25% of those  
27  
28 receiving industry payments believe this is appropriate *versus* 15% of those who did not ( $p<0.05$ ).  
29  
30

## 31 32 33 34 **DISCUSSION**

35  
36  
37 With the introduction of the Open PPSA and the increasing costs of healthcare, the debate on  
38  
39 financial COI has received a great deal of attention in the USA.<sup>1,24,25,28</sup> However, a direct  
40  
41 perspective by medical stakeholders on this matter is still unclear, particularly in Europe.  
42  
43

44  
45 The main findings from this anonymous questionnaire indicate that two-thirds of Italian medical  
46  
47 oncologists believe that COI is a relevant issue, with a higher perception among females, young  
48  
49 physicians, assistant chiefs of staff and those not receiving industry payments in the last 3 years.  
50  
51 Although nearly 60% suppose this is not a greater issue in oncology than in other medical  
52  
53 specialties, this does not mitigate the potential impact of the problem. Secondly, 62% of the sample  
54  
55 declared direct payments from the pharmaceutical industry in the last 3 years, with a greater  
56  
57 frequency in southern Italy, research hospitals, chiefs of staff and male physicians.  
58

1  
2  
3 Over 80% confirm that most oncology education and training is financially supported by industry,  
4  
5 with a greater proportion of followers among older physicians and chiefs. Subgroup analyses also  
6  
7 show there is a greater awareness of COI as a problem among women and young doctors, who are  
8  
9 also among those categories receiving fewer payments from industry. While it is difficult to  
10  
11 establish a causal relationship between increased awareness and lower frequency of payments (the  
12  
13 younger and female physicians groups might have a more idealistic attitude), the gender disparity in  
14  
15 industry relationships is a well-known phenomenon. In recent American analyses, only one-quarter  
16  
17 of physicians receiving payments were female, who, on average, also received less money per  
18  
19 person than men.<sup>29</sup> In our study, 70% of male *versus* 53% of female physicians received direct  
20  
21 payments from industry for speaking fees in the last 3 years. This percentage is in line with that  
22  
23 reported by a recent survey through the open payment act in the US, where 63% of oncologists  
24  
25 received a general payment in 2014.<sup>30</sup> Oncologists were also more likely to receive a general  
26  
27 payment and to hold ownership interest compared with non-oncologists.<sup>30</sup>  
28  
29  
30

31  
32 Another important source of funding from industry is research. Interestingly, while 60% of  
33  
34 physicians agree to receive a percentage fee for every patient enrolled in an industry- sponsored  
35  
36 trial, nearly 80% are favorable to disclose it in the patient's informed consent. This is a significant  
37  
38 inclination towards transparency among our professional community that has not yet been translated  
39  
40 in regulatory acts by the current legislation of clinical trials. This is also important because  
41  
42 physician payment for study participation in clinical trials is a potential COI that can adversely  
43  
44 affect patient trust.<sup>10,31</sup>  
45  
46

47  
48 The median net margin for the employee institution that was considered balanced for each patient  
49  
50 enrolled in an industry trial was 5,000€, which appears significantly lower than the current level of  
51  
52 industry per-patient fee, whose gross fee may now easily exceeds 30,000€. The vast majority of  
53  
54 respondents is also contrary to the current escalating trend to spend more for marketing and  
55  
56 promotion than for research and development by the industry, a notion which is rarely openly  
57  
58  
59  
60

1  
2  
3 declared by industry.<sup>15,16</sup> These considerations suggest that the surveyed sample is aware that the  
4  
5 current trend to increasing costs has a negative impact also on quality of care once the drug is  
6  
7 licensed. In the United States, cancer patients carry rising burdens of healthcare-related out-of-  
8  
9 pocket expenses, and a growing number of patients are considered underinsured. To save money, a  
10  
11 large proportion of these patients take less or nothing of the prescribed medications, a phenomenon  
12  
13 known as financial toxicity which is present also in Italy.<sup>19-32</sup>  
14  
15

16  
17 Nearly 80% see as unfair being co-author of an article written by a medical writer for an industry-  
18  
19 sponsored trial when no substantial scientific contribution has been made. This is in contrast to the  
20  
21 present tendency of most industry-sponsored trials to be reported by medical writers, often in  
22  
23 concomitance with presentation at premier international meetings.<sup>11</sup> The legal and ethical  
24  
25 consequences of ghost writing, including risk of plagiarism and loss of professionalism and genuine  
26  
27 intellectual contribution to advancement of science, is a subject of intense debate<sup>33,34</sup>  
28  
29

30  
31 Over 70% of the oncologists think their CME should be supported by their institution or public  
32  
33 sources and less than 10% by personal resources. The vast majority stated their first CME tool is  
34  
35 scientific journals but nearly 15% use industry sales representatives as the main CME method.  
36  
37 These findings are in line with the public landscape of our national health system stakeholders,  
38  
39 where CME is considered a right that should be covered by public resources and not a duty to be at  
40  
41 least partially covered with physician resources. Three quarters of Italian oncologists would agree to  
42  
43 be financially supported by industry for travel and lodging at international meetings, another  
44  
45 important source of industry expenditures. It is possible that this form of financial support is  
46  
47 perceived as less conflicting and the only way to attend important meetings given the scarcity of  
48  
49 public or private no-profit funding.  
50  
51

52  
53 Interestingly, over 70% believe that COI disclosure during presentations does not attenuate the risk  
54  
55 of scientific bias. However, approximately 60% believe that industry support does not influence  
56  
57

1  
2  
3 topic selection at meetings and that giving invited speeches does not influence personal drug  
4  
5 prescription.

6  
7  
8 Another important issue raised by our survey is the call for a higher level of transparency by  
9  
10 scientific societies, including annual detailed reporting of industry payments. Prior studies have  
11  
12 shown that disclosure of COI among Italian scientific societies does not attenuate the problem but  
13  
14 actually seems to be a justification to increase financial relationships.<sup>26</sup>

15  
16  
17 The consequences of financial COI on patient perception has been the subject of recent studies.<sup>8,10,35</sup>  
18  
19 In an ASCO survey of COI policies, the majority of non-physician stakeholders and patient  
20  
21 advocates felt that full disclosure of COI by physicians was expected and could be a factor in  
22  
23 patients' decisions regarding therapy.<sup>36</sup>

24  
25  
26 Altogether, the answers to the survey clearly show that the economic direct relationship between  
27  
28 clinicians and industry is deeply rooted in current practice. Money from industry regularly flows as  
29  
30 the result of declared marketing investments in the context of legal pathways. The hidden question  
31  
32 is whether a clinician who receives financial support for so many activities in his profession can be  
33  
34 impartial and objective in making clinical decisions. This is particularly true in all those clinical  
35  
36 settings where uncertainties on the added value of new drugs make treatment choices  
37  
38 questionable.<sup>17,18,20-22</sup> Most recent evidence indicates that the majority of registered cancer drugs in  
39  
40 Europe by EMA do not show a benefit in term of survival or quality of life<sup>37</sup>, indicating the  
41  
42 necessity of raising the evidence bar before market approval<sup>38</sup>. Moreover, in a recent analysis on 10  
43  
44 approved cancer drug in the US, the median cost to develop a drug was \$648.0 million, a figure  
45  
46 significantly lower than prior estimates, and the revenue since 4 years of approval was substantial  
47  
48 (median, \$1658.4 million; range, \$204.1 million to \$22 275.0 million)<sup>39</sup>, suggesting the need for a  
49  
50 global reconsideration of the pricing system especially in universal health systems.  
51  
52  
53  
54  
55  
56  
57  
58  
59  
60

1  
2  
3 To our knowledge this is the first national survey ever performed by Italian oncologists and one of  
4 the few prompted by medical stakeholders on their COI and physician-industry relationships. The  
5 questionnaire in an anonymous form has probably favored the disclosure of financial relationships  
6 with industry and an open attitude by respondents, an unprecedented opportunity for transparency.  
7  
8 The study has limitations, including the non-random selection of the respondents and the greater  
9 representation of chiefs of staff. A strength of our study is the large sample size which reflects the  
10 general characteristics of medical oncologists in Italy.<sup>27</sup>  
11  
12

13  
14  
15  
16  
17  
18 In conclusion, our study indicates that among Italian oncologists COI is perceived as an important  
19 issue influencing education, quality of care, science and costs. The overall view on COI calls for a  
20 process of rethinking of the relationship between clinicians and industry and, most importantly, a  
21 courageous step toward transparency. The surveyed clinicians, particularly younger and female  
22 physicians, do not argue against the role of physician- industry relationships but seem to disagree  
23 with the tendency toward direct financial relationships and low degree of transparency. Our findings  
24 suggest the need for a systematic approach in which all stakeholders in the health professions work  
25 together to protect professional judgment and integrity while advancing progress. In the present  
26 context of increasing health care costs and financial toxicity, alternative ways to support education  
27 and research and strict transparency policies could contribute to increased patient trust and equity in  
28 health care access.  
29  
30  
31  
32  
33  
34  
35  
36  
37  
38  
39  
40  
41  
42  
43

#### 44 **What is already known on this topic?**

45  
46  
47 Several studies have shown that financial conflict of interest increasingly affects every aspect of  
48 medicine, including care, education, research integrity, patient trust, guideline formulation,  
49 regulatory approval and scientific prominence. This is particularly relevant in medical oncology  
50 given the large industry investment and increasing drug costs in the field. However little is known  
51 about the medical perception and experience of the problem, particularly in Europe.  
52  
53  
54  
55  
56  
57  
58  
59  
60



**What this study adds?**

Of a total of 321 Italian oncologists who were surveyed anonymously, 68% felt the majority of them have a conflict of interest and 62% self declared direct payments from the pharmaceutical industry in the last 3 years. However, conflict of interest is perceived as an important issue influencing education, quality of care, research and costs. The majority also disagree with direct payments and call for a higher degree of transparency and a more stringent policy on conflict of interest..

For peer review only

Table 1. Main respondent characteristics

|                                                     | <i>No. (%)</i> |
|-----------------------------------------------------|----------------|
| Geographic Area                                     |                |
| North                                               | 161 (50.2%)    |
| Center                                              | 108 (33.6%)    |
| South                                               | 52 (16.2%)     |
| Age in years                                        |                |
| < 45                                                | 103 (32.1%)    |
| 45 - 59                                             | 133 (41.4%)    |
| ≥ 60                                                | 85 (26.5%)     |
| Sex*                                                |                |
| Male                                                | 170 (53.3%)    |
| Female                                              | 149 (46.7%)    |
| Place of Work                                       |                |
| Hospital                                            | 283 (88.2%)    |
| University                                          | 20 (6.2%)      |
| Research Institute                                  | 11 (3.4%)      |
| Other                                               | 7 (2.2%)       |
| Nature of Institution                               |                |
| Public                                              | 296 (92.2%)    |
| Private                                             | 25 (7.8%)      |
| Job Position                                        |                |
| Assistant Chief                                     | 190 (59.2%)    |
| Chief                                               | 98 (30.5%)     |
| Other                                               | 33 (10.3%)     |
| Years of Experience                                 |                |
| <15                                                 | 88 (27.4%)     |
| ≥15                                                 | 233 (72.6%)    |
| Direct payment from industries in the last 3 years* |                |
| No                                                  | 120 (37.6%)    |
| Yes                                                 | 199 (62.4%)    |

\*Two oncologists did not answer the question

Table 2. Subgroup analysis on question # 1: Do you believe most oncologists have direct conflict of interests with pharmaceutical companies?

|                                      | Disagree |      | Agree |      | <i>P</i> < * |
|--------------------------------------|----------|------|-------|------|--------------|
|                                      | no.      | %    | no.   | %    |              |
| <b>Country area</b>                  |          |      |       |      |              |
| North                                | 112      | 69.6 | 49    | 30.4 | 0.440        |
| Center                               | 68       | 63.0 | 40    | 37.0 |              |
| South                                | 37       | 71.2 | 15    | 28.8 |              |
| <b>Sex</b>                           |          |      |       |      | <b>0.001</b> |
| F                                    | 84       | 56.4 | 65    | 43.6 |              |
| M                                    | 131      | 77.1 | 39    | 22.9 |              |
| <b>Age</b>                           |          |      |       |      | 0.057        |
| < 45                                 | 61       | 59.2 | 42    | 40.8 |              |
| 45 — 59                              | 92       | 69.2 | 41    | 30.8 |              |
| ≥ 60                                 | 64       | 75.3 | 21    | 24.7 |              |
| <b>Workplace</b>                     |          |      |       |      | 0.583        |
| Research Institute                   | 9        | 81.8 | 2     | 18.2 |              |
| Hospital                             | 189      | 66.8 | 94    | 33.2 |              |
| University                           | 15       | 75.0 | 5     | 25.0 |              |
| Other                                | 4        | 57.1 | 3     | 42.9 |              |
| <b>Type of structure</b>             |          |      |       |      | 0.350        |
| Private                              | 19       | 76.0 | 6     | 24.0 |              |
| Public                               | 198      | 66.9 | 98    | 33.1 |              |
| <b>Job position</b>                  |          |      |       |      | <b>0.021</b> |
| Assistant chief                      | 119      | 62.6 | 71    | 37.4 |              |
| Chief                                | 77       | 78.6 | 21    | 21.4 |              |
| Other                                | 21       | 63.6 | 12    | 36.4 |              |
| <b>Years of experience</b>           |          |      |       |      | <b>0.023</b> |
| < 15                                 | 51       | 58.0 | 37    | 42.0 |              |
| ≥ 15                                 | 166      | 71.2 | 67    | 28.8 |              |
| <b>Direct payments from industry</b> |          |      |       |      | <b>0.029</b> |
| No                                   | 72       | 60.0 | 48    | 40.0 |              |
| Yes                                  | 143      | 71.9 | 56    | 28.1 |              |

\*Referred to bidirectional chi-square test

Table 3. Subgroup analysis on the question: “Have you received any payment to speak at educational meetings sponsored by a pharmaceutical company in the last 3 years?”

|                            | <i>No</i>  |          | <i>Yes</i> |          | <i>P</i> < * |
|----------------------------|------------|----------|------------|----------|--------------|
|                            | <i>no.</i> | <i>%</i> | <i>no.</i> | <i>%</i> |              |
| <b>Country area</b>        |            |          |            |          | <b>0.002</b> |
| North                      | 57         | 35.4     | 104        | 64.6     |              |
| Center                     | 52         | 49.1     | 54         | 50.9     |              |
| South                      | 11         | 21.1     | 41         | 78.9     |              |
| <b>Sex</b>                 |            |          |            |          | <b>0.002</b> |
| F                          | 69         | 46.6     | 79         | 53.4     |              |
| M                          | 51         | 30.0     | 119        | 70.0     |              |
| <b>Age</b>                 |            |          |            |          | 0.715        |
| < 45                       | 41         | 39.8     | 62         | 60.2     |              |
| 45 — 59                    | 50         | 38.2     | 81         | 61.8     |              |
| ≥ 60                       | 29         | 34.1     | 56         | 65.8     |              |
| <b>Workplace</b>           |            |          |            |          | <b>0.003</b> |
| Research Institute         | 0          | 0.0      | 11         | 100.0    |              |
| Hospital                   | 106        | 37.6     | 176        | 62.4     |              |
| University                 | 8          | 42.1     | 11         | 57.9     |              |
| Other                      | 6          | 85.7     | 1          | 14.3     |              |
| <b>Type of structure</b>   |            |          |            |          | 0.493        |
| Private                    | 11         | 44.0     | 14         | 56.0     |              |
| Public                     | 109        | 37.1     | 185        | 62.9     |              |
| <b>Job position</b>        |            |          |            |          | <b>0.016</b> |
| Assistant chief            | 72         | 38.3     | 116        | 61.7     |              |
| Chief                      | 29         | 29.6     | 69         | 70.4     |              |
| Other                      | 19         | 57.6     | 14         | 42.4     |              |
| <b>Years of experience</b> |            |          |            |          | 0.314        |
| < 15                       | 37         | 42.0     | 51         | 58.0     |              |
| ≥ 15                       | 83         | 35.9     | 148        | 64.1     |              |

\*Referred to bidirectional chi-square test

Table 4. Role of public entities and private industry on continuous medical education (CME) support.

|                                                                                                                                                                                                                                                                                                                               | <b>No. of important or very important score 4+5 (%)</b>                                                   |
|-------------------------------------------------------------------------------------------------------------------------------------------------------------------------------------------------------------------------------------------------------------------------------------------------------------------------------|-----------------------------------------------------------------------------------------------------------|
| <b>Questions</b>                                                                                                                                                                                                                                                                                                              |                                                                                                           |
| <p>1. Which method do you primarily use for your CME? You can select multiple choices and attribute different scores from “not at all important” (1) to “very important” (5).</p> <p>Medical websites</p> <p>Scientific journals</p> <p>CME courses</p> <p>Conferences</p> <p>Pharmaceutical representatives</p> <p>Books</p> | <p>185 (60.8)</p> <p>278 (89.1)</p> <p>181 (59.5)</p> <p>211 (67.4)</p> <p>42 (13.7)</p> <p>62 (20.9)</p> |
| <p>2. Who should pay for your CME? You can select multiple choices and attribute different scores from “not at all important” (1) to “very important” (5).</p> <p>- Myself</p> <p>- Hospital</p> <p>- Public Institutions</p> <p>- Pharmaceutical companies</p> <p>- Research Foundations</p>                                 | <p>27 (9.3)</p> <p>256 (83.1)</p> <p>211 (70.3)</p> <p>51 (17.3)</p> <p>140 (48.1)</p>                    |

1  
2  
3 Figure Legend. Figure 1: Questions and answers evaluated with a 4-point Likert scale on CoI (%)  
4  
5  
6  
7  
8  
9  
10  
11  
12  
13  
14  
15  
16  
17  
18  
19  
20  
21  
22  
23  
24  
25  
26  
27  
28  
29  
30  
31  
32  
33  
34  
35  
36  
37  
38  
39  
40  
41  
42  
43  
44  
45  
46  
47  
48  
49  
50  
51  
52  
53  
54  
55  
56  
57  
58  
59  
60

For peer review only

## ACKNOWLEDGMENT

The Authors wish to thank Katherine Brandt for reviewing the English and Cristina Giua for technical assistance.

### Contributors

ADC, GN, FR: idea, planning data set, data analysis, wrote the manuscript.

EB, BR, VL: planning data set, statistical analysis, wrote the manuscript.

FA, LF, CV: discussion of results.

MT, MC: discussion of results, standing funding.

**Competing interests:** none

**Ethics approval:** not applicable

**Provenance and peer review:** not commissioned; externally peer reviewed.

**Data sharing statement:** All data are stored in the server of CIPOMO and are available on request.

**REFERENCES**

1. Stead WW. The Complex and Multifaceted Aspects of Conflicts of Interest. *JAMA*.2017;317(17):1765-1767.
2. McCarthy M. PubMed is urged to include competing interest information in abstracts. *BMJ*. 2016 Apr 7;353:i2018. doi: 10.1136/bmj.i2018. PubMed PMID: 27056448.
3. McCarthy M. US doctors earn speaking and consulting fees from drug companies that sponsor their research. *BMJ*. 2014 Mar 27;348:g2410. doi: 10.1136/bmj.g2410. PubMed PMID: 24677695.
4. Lundh A, Lexchin J, Mintzes B, Schroll JB, Bero L. Industry sponsorship and research outcome. *Cochrane Database Syst Rev*. 2017. 2017 Feb 16;2:MROOOO33.
5. Ahn R, Woodbridge A, Abraham A et al. Financial ties of principal investigators and randomized controlled trial outcomes: cross sectional study. *BMJ*. 2017 Jan 17;356:i6770. doi: 10.1136/bmj.i6770. PubMed PMID: 28096109; PubMed Central PMCID: PMC5241252.
6. Mitchell AP, Basch EM, Dusetzina SB. Financial Relationships With Industry Among National Comprehensive Cancer Network Guideline Authors. *JAMA Oncol*. 2016; 2(12):1628-1631.
7. Wise J. Still too little transparency among guideline writers and others. *BMJ*. 2017 Jan 17;356:j276. doi: 10.1136/bmj.j276. PubMed PMID: 28096172.
8. Hampson LA, Agrawal M, Joffe S, Gross CP, Verter J, Emanuel EJ. Patients' views on financial conflicts of interest in cancer research trials. *N Engl J Med*. 2006;355(22):2330-7.
9. Holbrook A, Lexchin J, Pullenayegum E et al. What do Canadians think about physician-pharmaceutical industry interactions? *Health Policy*. 2013;112(3):255-63.
10. Klein E, Solomon AJ, Corboy J, Bernat J. Physician compensation for industry-sponsored clinical trials in multiple sclerosis influences patient trust. *Mult Scler Relat Disord*. 2016;8:4-8.
11. Moy B, Bradbury AR, Helft PR, Egleston BL, Sheikh-Salah M, Peppercorn J. Correlation between financial relationships with commercial interests and research prominence at an oncology meeting. *J Clin Oncol*. 2013 Jul 20;31(21):2678-84.



12. Lundh A, Barbateskovic M, Hróbjartsson A, Gøtzsche PC. Conflicts of interest at medical journals: the influence of industry-supported randomised trials on journal impact factors and revenue - cohort study. *PLoS Med*. 2010 Oct 26;7(10):e1000354. Erratum in: *PLoS Med*. 2011 Feb;8(2).
13. Global Oncology Trend Report a Review of 2015 and Outlook to 2020. IMS Institute for healthcare informations. <http://www.imshealth.com/en/thought-leadership/quintilesims-institute/reports/global-oncology-trend-report-a-review-of-2015-and-outlook-to-2020>.
14. Saltz LB. Perspectives on Cost and Value in Cancer Care. *JAMA Oncol*. 2016;2(1):19-21.
15. Socolar D, Sager A. Pharmaceutical marketing and research spending: The evidence does not support PhRMA's claims. Presented at the American Public Health Association Annual Meeting (session 2018.0), Atlanta, GA. 2001.
16. Anderson R. Pharmaceutical industry gets high on fat profits. By Business reporter, BBC News 6 November 2014. <http://www.bbc.com/news/business-28212223>
17. Cressman S, Browman GP, Hoch JS, Kovacic L, Peacock SJ. A Time-Trend Economic Analysis of Cancer Drug Trials. *Oncologist*. 2015;20(7):729-36.
18. Mailankody S, Prasad V. Five Years of Cancer Drug Approvals: Innovation, Efficacy, and Costs. *JAMA Oncol*. 2015;1(4):539-40. Erratum in: *JAMA Oncol*. 2015 Jul;1(4):544.
19. Zafar SY, Peppercorn JM, Schrag D et al. The financial toxicity of cancer treatment: a pilot study assessing out-of-pocket expenses and the insured cancer patient's experience. *Oncologist*. 2013;18(4):381-90.
20. Kantarjian HM, Fojo T, Mathisen M, Zwelling LA. Cancer drugs in the United States: Justum Pretium--the just price. *J Clin Oncol*. 2013;31(28):3600-4. Erratum in: *J Clin Oncol*. 2015;33(30):3523.
21. Pfister DG. The just price of cancer drugs and the growing cost of cancer care: oncologists need to be part of the solution. *J Clin Oncol*. 2013;31(28):3487-9.
22. Fricker J. New NICE criteria for drug access. *Lancet Oncol*. 2017;18(5):576.
23. Jimenez J. Why the Approach to Drug Pricing Has to Change Now. 2016. <https://www.forbes.com/sites/sciencebiz/2016/11/01/why-the-approach-to-drug-pricing-has-to-change-now/#62f0330657fc>.

- 1  
2  
3 24. Chimonas S, DeVito NJ, Rothman DJ. Bringing Transparency to Medicine: Exploring Physicians'  
4 Views and Experiences of the Sunshine Act. *Am J Bioeth.* 2017;17(6):4-18.  
5  
6  
7 25. Lenzer J, Brownlee S. Diverting attention from financial conflicts of interest. *BMJ.* 2015 Jun  
8 30;350:h3505. doi: 10.1136/bmj.h3505. PubMed PMID: 26129927.  
9  
10  
11 26. Fabbri A, Gregoraci G, Tedesco D et al. Conflict of interest between professional medical societies  
12 and industry: a cross-sectional study of Italian medical societies' websites. *BMJ Open.*  
13 2016.1;6(6):e011124. Erratum in: *BMJ Open.* 2016;6(6):e011124corr1.  
14  
15  
16 27. Libro bianco VI edizione. Milan, Italy: Associazione Italiana di Oncologia Medica; 2015.  
17 [http://www.aiom.it/libro-bianco-2015/professionisti/documenti-scientifici/pubblicazioni/libro-  
19 bianco-2015/libro-bianco-2015/1,759,1](http://www.aiom.it/libro-bianco-2015/professionisti/documenti-scientifici/pubblicazioni/libro-<br/>18 bianco-2015/libro-bianco-2015/1,759,1)  
20  
21  
22 28. Rose SL, Krzyzanowska MK, Joffe S. Relationships between authorship contributions and authors'  
23 industry financial ties among oncology clinical trials. *J Clin Oncol.* 2010 Mar 10;28(8):1316-21.  
24  
25  
26 29. Tringale KR, Marshall D, Mackey TK, Connor M, Murphy JD, Hattangadi-Gluth JA. Types and  
27 Distribution of Payments From Industry to Physicians in 2015. *JAMA.* 2017;317(17):1774-1784.  
28  
29  
30 30. Marshall DC, Moy B, Jackson ME, Mackey TK, Hattangadi-Gluth JA. Distribution and Patterns of  
31 Industry-Related Payments to Oncologists in 2014. *J Natl Cancer Inst.* 2016;108(12).  
32  
33  
34 31. Wen L. Patients can't trust doctors' advice if we hide our financial connections with drug companies.  
35 *BMJ.* 2014 Jan 15;348:g167. doi: 10.1136/bmj.g167. Review. PubMed PMID: 24430529.  
36  
37  
38 32. Perrone F, Jommi C, Di Maio M et al. The association of financial difficulties with clinical outcomes  
39 in cancer patients: secondary analysis of 16 academic prospective clinical trials conducted in Italy.  
40 *Ann Oncol.* 2016Dec;27(12):2224-2229. doi: 10.1093/annonc/mdw433.  
41  
42  
43 33. Das N, Panjabi M. Plagiarism: Why is it such a big issue for medical writers? Perspectives in  
44 *Clinical Research.* 2011;2(2):67-71.  
45  
46  
47 34. Wislar JS, Flanagan A, Fontanarosa PB, Deangelis CD. Honorary and ghost authorship in high  
48 impact biomedical journals: a cross sectional survey. *BMJ.* 2011;343:d6128.  
49  
50  
51 35. Wong YN, Schluchter MD, Albrecht TL et al. Financial Concerns About Participation in Clinical  
52 Trials Among Patients With Cancer. *J Clin Oncol.* 2016 Feb 10;34(5):479-87.  
53  
54  
55  
56  
57  
58  
59  
60

- 1  
2  
3 36. Lockhart AC, Brose MS, Kim ES et al. Physician and stakeholder perceptions of conflict of interest  
4 policies in oncology. *J Clin Oncol*. 2013;31(13):1677-82.  
5  
6  
7 37. Davis C, Naci H, Gurpinar E, Poplavska E, Pinto A, Aggarwal A. Availability of evidence of  
8 benefits on overall survival and quality of life of cancer drugs approved by European Medicines  
9 Agency: retrospective cohort study of drug approvals 2009-13. *BMJ*. 2017 Oct 4;359:j4530.  
10  
11  
12 38. Cohen D. Cancer drugs: high price, uncertain value. *BMJ*. 2017 Oct 4;359:j4543. doi:  
13 10.1136/bmj.j4543.  
14  
15  
16 39. Prasad V, Mailankody S. Research and Development Spending to Bring a Single Cancer Drug to  
17 Market and Revenues After Approval. *JAMA Intern Med*. 2017 Sep 11. doi:  
18 10.1001/jamainternmed.2017.3601  
19  
20  
21  
22  
23  
24  
25  
26  
27  
28  
29  
30  
31  
32  
33  
34  
35  
36  
37  
38  
39  
40  
41  
42  
43  
44  
45  
46  
47  
48  
49  
50  
51  
52  
53  
54  
55  
56  
57  
58  
59  
60

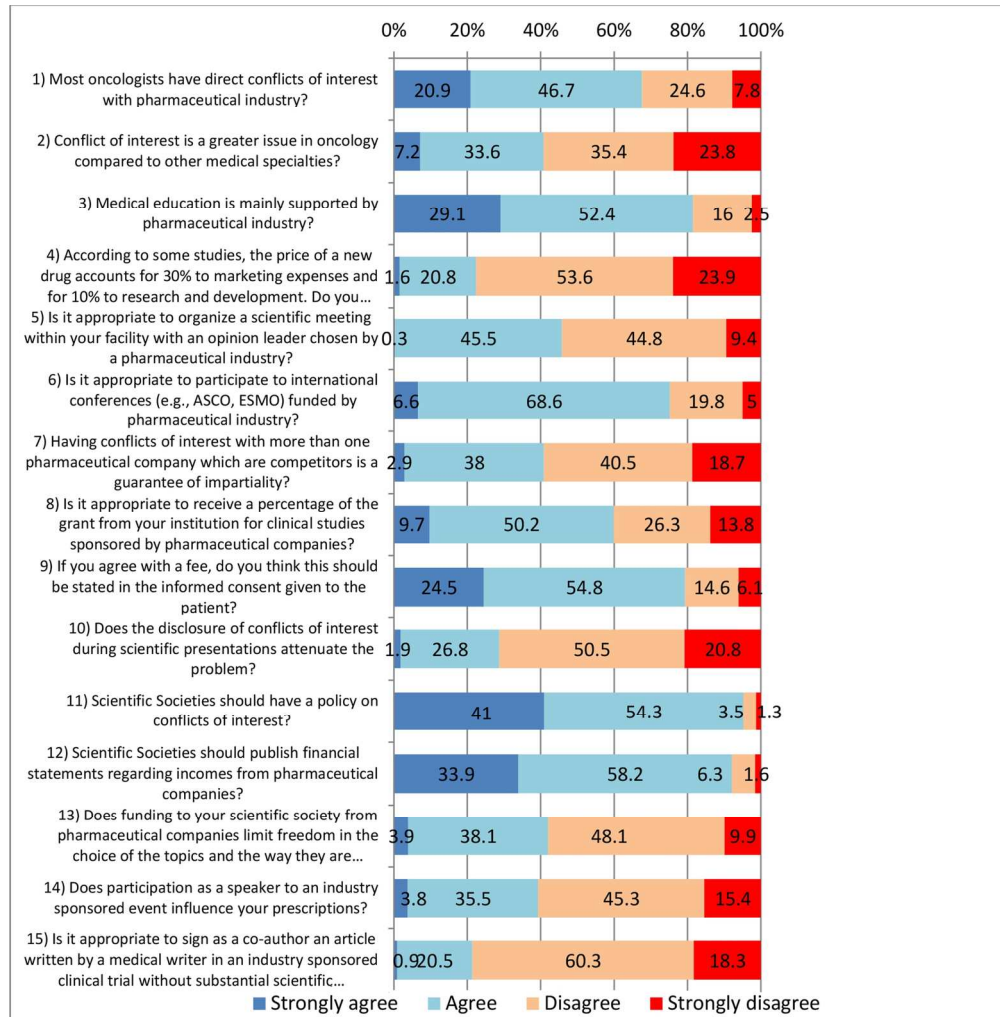

Figure 1: Questions and answers evaluated with a 4-point Likert scale on CoI (%)

171x174mm (300 x 300 DPI)

# BMJ Open

## Conflict of interest among Italian medical oncologists. A national survey

|                                 |                                                                                                                                                                                                                                                                                                                                                                                                                                                                                                                                                                                                                                                                                                                                                                                                                           |
|---------------------------------|---------------------------------------------------------------------------------------------------------------------------------------------------------------------------------------------------------------------------------------------------------------------------------------------------------------------------------------------------------------------------------------------------------------------------------------------------------------------------------------------------------------------------------------------------------------------------------------------------------------------------------------------------------------------------------------------------------------------------------------------------------------------------------------------------------------------------|
| Journal:                        | <i>BMJ Open</i>                                                                                                                                                                                                                                                                                                                                                                                                                                                                                                                                                                                                                                                                                                                                                                                                           |
| Manuscript ID                   | bmjopen-2017-020912.R1                                                                                                                                                                                                                                                                                                                                                                                                                                                                                                                                                                                                                                                                                                                                                                                                    |
| Article Type:                   | Research                                                                                                                                                                                                                                                                                                                                                                                                                                                                                                                                                                                                                                                                                                                                                                                                                  |
| Date Submitted by the Author:   | 27-Feb-2018                                                                                                                                                                                                                                                                                                                                                                                                                                                                                                                                                                                                                                                                                                                                                                                                               |
| Complete List of Authors:       | DeCensi, Andrea; E.O. Ospedali Galliera, S.C. Oncologia Medica; Wolfson Institute of Preventive Medicine<br>Numico, Gianmauro; Division of Medical Oncology, SS. Antonio e Biagio Hospital<br>Ballatori, Enzo; Medical Statistician, Spinetoli<br>Artioli, Fabrizio; Department of Oncology, Carpi and Mirandola Hospitals<br>Clerico, Mario; Department of Medical Oncology, Hospital of Biella; President, CIPOMO<br>Fioretto, Luisa; Department of Oncology, S.M. Annunziata Hospital Livellara, Virginia; Division of Medical Oncology, Galliera Hospital<br>Ruggeri, Benedetta; Clinical Governance, Area Vasta 5, ASUR Marche<br>Tomirotti, Maurizio; CIPOMO Past President<br>Verusio, Claudio; Division of Medical Oncology, ASST Valleolona<br>Roila, Fausto; Division of Medical Oncology, Ospedale Santa Maria |
| <b>Primary Subject Heading</b>: | Ethics                                                                                                                                                                                                                                                                                                                                                                                                                                                                                                                                                                                                                                                                                                                                                                                                                    |
| Secondary Subject Heading:      | Oncology, Health policy, Medical education and training, Medical publishing and peer review                                                                                                                                                                                                                                                                                                                                                                                                                                                                                                                                                                                                                                                                                                                               |
| Keywords:                       | conflict of interest, survey oncologist, physician industry relationship, cancer drug prices, ghost writing                                                                                                                                                                                                                                                                                                                                                                                                                                                                                                                                                                                                                                                                                                               |
|                                 |                                                                                                                                                                                                                                                                                                                                                                                                                                                                                                                                                                                                                                                                                                                                                                                                                           |

SCHOLARONE™  
Manuscripts

Original Article: **Conflict of interest among Italian medical oncologists. A national survey.**

Andrea DeCensi<sup>1,2</sup>, Gianmauro Numico<sup>3</sup>, Enzo Ballatori<sup>4</sup>, Fabrizio Artioli<sup>5</sup>, Mario Clerico<sup>6</sup>, Luisa Fioretto<sup>7</sup>, Virginia Livellara<sup>1</sup>, Benedetta Ruggeri<sup>8</sup>, Maurizio Tomirotti<sup>9</sup>, Claudio Verusio<sup>10</sup> and Fausto Roila<sup>11</sup> on behalf of the Italian College of Chief Medical Oncologists (CIPOMO).

<sup>1</sup>Division of Medical Oncology, Galliera Hospital, Genoa, Italy;

<sup>2</sup>Wolfson Institute of Preventive Medicine, Queen Mary University of London, UK;

<sup>3</sup>Division of Medical Oncology, SS. Antonio e Biagio Hospital, Alessandria, Italy;

<sup>4</sup>Medical Statistician, Spinetoli, Ascoli Piceno, Italy;

<sup>5</sup>Department of Oncology, Carpi and Mirandola Hospitals;

<sup>6</sup>Department of Medical Oncology, Hospital of Biella, Italy; President, CIPOMO;

<sup>7</sup>Department of Oncology, S.M. Annunziata Hospital, Florence, Italy;

<sup>8</sup>Clinical Governance, Area Vasta 5, ASUR Marche, Italy;

<sup>9</sup>CIPOMO Past President;

<sup>10</sup>Division of Medical Oncology, ASST Valleolona, Saronno, Italy;

<sup>11</sup>Division of Medical Oncology, Ospedale Santa Maria, Terni, Italy.

**Running title:** Italian oncologists and conflict of interest

**Keywords:** conflict of interest; survey oncologist; physician industry relationship; cancer drug prices; ghost writing.

**Financial support:** The Italian College of Medical Oncology Chiefs (CIPOMO) supported online questionnaire set up but the content of the paper does not necessarily represent its view.

**Disclosure:** The authors indicate no potential conflict of interest

**Corresponding author:** Dr Andrea DeCensi, Division of Medical Oncology, E.O. Ospedali Galliera, Mura delle Cappuccine 14, Genoa, 16128, Italy; tel.: +39 0105634501; fax: +39 01057481090; e-mail: [andrea.decensi@galliera.it](mailto:andrea.decensi@galliera.it)

**Word count:** 3387

## ARTICLE SUMMARY

### **ABSTRACT 300 words**

#### **Objective**

To assess the Italian medical oncologist's opinion regarding the implications of conflict of interest (COI) on medical education, care and research and to evaluate their direct financial relationships.

#### **Design**

National cross-sectional survey conducted between March and April 2017 among Italian oncologists.

#### **Setting**

Online survey sponsored by the Italian College of Medical Oncology Chiefs through its web site.

#### **Participants:**

Italian oncologists who filled out an anonymous questionnaire including 19 items and individual and working characteristics.

#### **Main outcome measures**

The proportion of medical oncologists perceiving COI as an outstanding issue and those receiving direct payments from industry.

#### **Results**

The number of responders were 321, representing 13% of Italian tenured medical oncologists. Overall, 62% declared direct payments from pharmaceutical industry in the last 3 years. Sixty-eight percent felt the majority of Italian oncologists have a COI with industry but 59% suppose this is not greater than that of other specialties. Eighty-two percent consider that most oncology education is supported by industry. More than 75% believe that current allocation of industry budget on marketing and promotion rather than research and development is unfair but 75% consider it appropriate to receive travel and lodging hospitality from industry. A median net profit margin of 5.000€ per patient enrolled in an industry trial was considered appropriate for the employee institution. Sixty percent agree to receive a personal fee for patients enrolled in industry trials but 79% state this should be reported in the informed consent. Over 90% believe that scientific societies

1  
2  
3 should publish a financial report of industry support. Finally, 79% disagree to being co-author of an  
4 article written by a medical writer when no substantial scientific contribution is made.  
5

## 6 **Conclusions**

7  
8  
9 Among Italian oncologists COI is perceived as an important issue influencing costs, education, care  
10 and science. A more rigorous policy on COI should be implemented.  
11  
12  
13  
14  
15  
16  
17  
18  
19  
20  
21  
22  
23  
24  
25  
26  
27  
28  
29  
30  
31  
32  
33  
34  
35  
36  
37  
38  
39  
40  
41  
42  
43  
44  
45  
46  
47  
48  
49  
50  
51  
52  
53  
54  
55  
56  
57  
58  
59  
60

For peer review only



## STRENGTHS AND LIMITATIONS OF THIS STUDY

- This is the first national survey performed by Italian oncologists and one of the few prompted by medical oncologists regarding their conflict of interest and physician-industry relationships in Europe.
- The sample size of 321 is quite large, as it represents 13% of the 2,260 tenured Italian certified medical oncologists from the 319 Units of the country, making the results of the survey well founded.
- Another strength of the questionnaire is its anonymous form which favored the disclosure of financial relationships with industry and an open attitude by respondents.
- The study has limitations, including the non-random selection of the respondents and the greater representation of chiefs of staff compared with the overall population of medical oncologists.

## INTRODUCTION

A conflict of interest (COI) exists when professional judgment concerning a primary interest such as patient welfare or the validity of research may be influenced by a secondary interest such as financial gain or career advancement. Financial relationships between industry and physicians and/or researchers are common and may be direct, consisting of stock options, advisory fees, honoraria, speaking fees, travel and lodging expenses, or indirect, such as research support to researcher's institutions. COI increasingly affects every aspect of medicine, including care, education, research integrity, patient trust, guideline formulation, regulatory approval and scientific prominence.<sup>1-7</sup>

Collaboration between industry and clinicians and/or researchers creates challenges and opportunities. While these relationships may contribute to advancement in the field, there is a need to better understand the negative consequences of COI and how best to report and manage it. Systematic reviews have found that pharmaceutical industry- sponsored studies are more often favorable to the sponsor's product compared with studies having other sources of sponsorship.<sup>4,5</sup> Public opinion on physician-pharmaceutical industry interactions differs depending on context and specific country health care models<sup>8,9</sup>, but some studies suggest a significant level of concern regarding interaction involving direct financial benefit to physicians.<sup>9,10</sup>

In medical oncology, financial relationships have increased through the years and have influenced clinical research, scientific prominence and visibility.<sup>11,12</sup> The issue is particularly important given the increasing volume of investments made by the pharmaceutical industry in cancer treatment.<sup>13</sup> In this price increase strategy<sup>14</sup>, pharmaceutical companies tend to spend much more for marketing and promotional activities than for research and development.<sup>15,16</sup> Evaluation of the clinical benefits that oncology drugs offer as a function of their cost has become complex and for some clinical

1  
2  
3 indications, health benefits are diminishing over time<sup>17</sup>. Moreover, these benefits do not always  
4 follow criteria of innovation<sup>18</sup> and provide increasing financial toxicity to patients.<sup>19</sup> There is  
5 concern that the substantial increase in drug prices may hamper both universal and private health  
6 care systems sustainability in many countries<sup>14, 20-22</sup>, while this is also of concern to top managers  
7 of pharmaceutical industries.<sup>23</sup>

14 The debate on COI has received attention in the United States since the introduction of the  
15 Physician Payments Sunshine Act (PPSA), which requires health care product manufacturers to  
16 report payments of more than \$10 to physicians to the federal government. Together with  
17 transparency, PPSA may increase medical professionalism, but it has received mixed opinions  
18 among physicians and experts in the field.<sup>24,25</sup> Conversely, little is known about the opinion of  
19 medical doctors in universal health systems such as those in Europe. A recent survey conducted in  
20 Italy showed that industry sponsorship of medical conferences is common, while the presence of a  
21 structured regulatory system is not. Disclosure of industry funding to medical societies was very  
22 limited.<sup>26</sup>

34 To ascertain the Italian situation, we assessed the opinion of Italian medical oncologists on different  
35 aspects and implications of COI in a national survey.

## 42 **METHODS**

45 The Italian College of Medical Oncology Chiefs (CIPOMO) set up an online national cross-  
46 sectional survey of its members. CIPOMO accounts for 184 chiefs of hospital oncology  
47 divisions/departments. Questionnaires were not sent directly to CIPOMO members. We used a  
48 passive approach to avoid intrusive claims, given the sensitivity of the topic, so the denominators  
49 are unknown. The survey was posted on the CIPOMO website for 6 weeks and three reminder  
50 emails were sent to the regional delegates of CIPOMO to advertise the survey and to involve

1  
2  
3 collaborators. Medical oncologists working in research institutions and university hospitals do not  
4 belong to CIPOMO but those willing to participate who were informed by word of mouth were not  
5 excluded from the survey.  
6  
7

8  
9  
10 The questionnaire was authored by three members of CIPOMO and was based on outstanding  
11 issues in the oncology community and reviewed by eight members of the CIPOMO board of  
12 directors. After approval, the questionnaire was written using the “SurveyMonkey” platform  
13 ([www.surveymonkey.com](http://www.surveymonkey.com)) and presented on line from March 1 to April 15, 2017. CIPOMO  
14 members were reminded to complete the survey through three repeated email messages.  
15  
16 Completion of the survey was anonymous although baseline information (country area, age, sex,  
17 duration of oncology experience, type of institution and position) was requested before proceeding.  
18  
19 Ethics approval was not required because the research survey was considered morally acceptable  
20 and could not risk harming the study participants. Moreover, Italian legislation does not require  
21 ethics approval for research not involving patients.  
22  
23  
24  
25  
26  
27  
28  
29  
30

31  
32 The survey was composed of 19 questions investigating feelings, opinions and experience of the  
33 respondents on different aspects of COI (Figure 1 and text). These include the following areas: the  
34 influence of COI in medical oncology and drug pricing; influence of the drug industry on  
35 continuous medical education; the percentage of direct payments from industry; the acceptability of  
36 travel and lodging coverage by industry and per-patient fee for clinical trials and its disclosure in  
37 the informed consent; the payment amount of per-patient fee to the institution for a trial; the role of  
38 disclosure as a deterrent of COI; the influence of COI on scientific societies; the influence of COI  
39 on drug prescriptions; the opinion on ghost writing in scientific articles. Main outcome measures  
40 were the proportion of medical oncologists perceiving COI as an outstanding issue and those  
41 receiving direct payments from industry.  
42  
43  
44  
45  
46  
47  
48  
49  
50  
51  
52  
53

54 Respondents were requested to quantify in a 4-point Likert scale the extent to which they agreed  
55 with the proposed questions or statements. In the analysis, 17 answers were grouped to facilitate  
56  
57  
58

1  
2  
3 understanding of results (i.e., “strongly agree” plus “agree” *versus* “strongly disagree” plus  
4 “disagree”). One item on net profit margin led to an answer as a continuous variable, whereas  
5 another item on direct payment was dichotomized (Yes, No).  
6  
7  
8  
9

### 10 **Statistical analysis**

11  
12 Answers were collected by the online platform and transformed in a data sheet for analysis. Usual  
13 descriptive statistics were used to show both the respondent characteristics and the general results.  
14  
15 Moreover, an exploratory analysis for subgroups was performed considering the following  
16 explicative variables: geographic area (north, center, south), sex (male, female), age (< 45, 45-59, ≥  
17 60 years), place of work (hospital, university, research institute, other), nature of institution (public,  
18 private), job position (assistant chief, chief, other), years of oncology experience (< 15, ≥ 15), direct  
19 payment from industry in the last three years (No, Yes). All answers to the questionnaire items were  
20 in turn used as dependent variables. Due the explorative purpose of the analysis, no adjustment for  
21 Bonferroni’s inequality was made. Given the cross-sectional nature of the study, where the  
22 responders were not randomly chosen, bidirectional chi-square tests assuming alpha=0.05 as  
23 significance level were calculated to provide a measure of the strength of association and not with  
24 inferential purposes. A sample size of at least 220 respondents was considered adequate as it  
25 represents 10% of the total medical oncologist population in Italy.  
26  
27  
28  
29  
30  
31  
32  
33  
34  
35  
36  
37  
38  
39  
40

### 41 **Patient and public involvement**

42  
43 The issues of increasing health care costs and of a trustful relationship between patients and  
44 physicians were the main reasons of the survey and were highlighted in the introduction section.  
45  
46 Neither patients nor public were involved in this study. The findings of the survey will be  
47 disseminated through a press release and media coverage. A position paper on COI by CIPOMO is  
48 under preparation.  
49  
50  
51  
52  
53  
54  
55  
56  
57  
58  
59  
60

## RESULTS

The responders were 321, from all 20 Italian regions, representing 13% of the 2,260 tenured Italian certified medical oncologists from the 319 Units of the country, according to the White Book of the Italian Association of Medical Oncology.<sup>27</sup> The respondent characteristics are summarized in Table 1. They reflect the main characteristics of the Italian population of oncologists, with the majority of them employed in northern Italy, having equal sex distribution, a third being aged 45 years or younger and working predominantly in public hospitals. However, there was a greater proportion of chiefs of staff because of the nature of the study sponsor.

The questionnaire and answers concerning the COI are described in Figure 1. Over two-thirds (68%) believe the majority of Italian oncologists have a COI with industry. A subgroup analysis indicates a greater proportion of them among females, younger physicians, assistant chiefs and those who did not receive payments from industry in the last 3 years ( $p < 0.05$ , table 2). However, 59% assume the COI in oncology is no greater than in other medical specialties.

Overall, 62% declared general payments from the pharmaceutical industry in the last 3 years, with a significantly greater proportion among those living in southern Italy, males, oncologists working in research institutes and chiefs of staff ( $p < 0.05$ , Table 3).

Eighty-one percent believe that most oncology education is supported by industry, with a greater proportion among older physicians and chiefs of staff ( $p < 0.05$ ), while over 70% think their continuous medical education (CME) should be supported by their institution or public sources and only less than 10% and 20% think it should be paid for by themselves or the industry, respectively (Table 4). The vast majority stated their first CME tool is scientific journals (89%), but 14% use pharmaceutical representatives as their main CME source.

1  
2  
3 However, 54% of the medical oncologists consider it inappropriate to organize a scientific meeting  
4 within his/her facility with an opinion leader chosen by a pharmaceutical company, especially in the  
5 north and among the chiefs of staff ( $p<0.05$ ).  
6  
7  
8  
9

10 About 77% believe that the greater allocation of budget placed by industry on marketing and  
11 promotion relative to research and development is inappropriate, with a greater proportion of  
12 supporters among younger physicians and non-chiefs of staff ( $p<0.05$ ), but 75% of all respondents  
13 consider it appropriate to receive travel and lodging hospitality from industry to attend international  
14 meetings, with a significantly greater proportion of supporters among those receiving direct  
15 industry payments ( $p<0.05$ ).  
16  
17  
18  
19  
20  
21  
22

23 A median net profit margin of €5,000 (mean±SD=€9,888±10,414) per patient enrolled in a trial was  
24 considered an appropriate amount for the investigator's institution, although the distribution had a  
25 long tail towards higher values.  
26  
27  
28  
29  
30

31 Sixty percent would agree to receive a personal fee for each patient enrolled in an industry  
32 sponsored trial, with a greater proportion among those who received payments from industry  
33 ( $p<0.05$ ), but 79% state this should be reported in the patient's informed consent.  
34  
35  
36  
37

38 Nearly 60% think that disclosing a COI with different companies who are competitors is not a  
39 guarantee of impartiality and 71% believe that COI disclosure does not attenuate the risk of  
40 scientific bias. However, 48% of those working in private institutions *versus* 27% of those working  
41 in public institutions believe that COI disclosure attenuates the problem ( $p<0.05$ ).  
42  
43  
44  
45  
46

47 Over 90% believe that scientific societies should have a COI policy and that a detailed report of the  
48 financial support by the industry should be published annually. A total of 58% believe that industry  
49 support does not influence topic selection in meetings and 61% believe that giving an invited  
50 speech by industry does not influence their drug prescription. However, a higher proportion of male  
51 and older physicians feel that prescription is influenced by direct industry payments ( $p<0.05$ ).  
52  
53  
54  
55  
56  
57  
58

1  
2  
3 Finally, 79% consider it unfair to be co-author of an article written by a medical writer for an  
4 industry-sponsored trial when no substantial scientific contribution is made. However, 25% of those  
5 receiving industry payments believe this is appropriate *versus* 15% of those who did not ( $p<0.05$ ).  
6  
7  
8  
9

## 10 11 12 13 **DISCUSSION**

14  
15  
16 With the introduction of the open Physician Payments Sunshine Act and the increasing costs of  
17 healthcare, the debate on financial COI has received a great deal of attention in the USA.<sup>1,24,25,28</sup>  
18  
19 Particularly in Europe, however, a direct perspective by the medical community on this matter is  
20 still unclear.  
21  
22  
23  
24

25  
26 The main findings from this anonymous questionnaire indicate that two-thirds of Italian medical  
27 oncologists believe that COI is a relevant issue, with a higher perception among females, young  
28 physicians, assistant chiefs of staff and those not receiving industry payments in the last three years.  
29  
30 Although nearly 60% suppose this is not a greater issue in oncology than in other medical  
31 specialties, this does not mitigate the potential impact of the problem. Secondly, 62% of the sample  
32 declared direct payments from the pharmaceutical industry in the last three years, with a greater  
33 frequency in southern Italy, research hospitals, chiefs of staff and male physicians.  
34  
35  
36  
37  
38  
39  
40

41  
42 Over 80% confirm that most oncology education and training is financially supported by industry,  
43 with a greater proportion of followers among older physicians and chiefs. Subgroup analyses also  
44 show there is a greater awareness of COI as a problem among women and young doctors, who are  
45 also among those categories receiving fewer payments from industry. While it is difficult to  
46 establish a causal relationship between increased awareness and lower frequency of payments (the  
47 younger and female physicians groups might have a more idealistic attitude), the gender disparity in  
48 industry relationships is a well-known phenomenon. In recent American analyses, only one-quarter  
49 of physicians receiving payments were female, who, on average, also received less money per  
50  
51  
52  
53  
54  
55  
56  
57  
58  
59  
60



1  
2  
3 person than men.<sup>29</sup> In our study, 70% of male *versus* 53% of female physicians received direct  
4  
5 payments from industry for speaking fees in the last 3 years. This percentage is in line with that  
6  
7 reported by a recent survey through the open payment act in the United States, where 63% of  
8  
9 oncologists received a general payment in 2014.<sup>30</sup> Oncologists were also more likely to receive a  
10  
11 general payment and to hold ownership interest compared with non-oncologists.<sup>30</sup>  
12

13  
14 Another important source of funding from industry is research. Interestingly, while 60% of  
15  
16 physicians would agree to receive a percentage fee for every patient enrolled in an industry-  
17  
18 sponsored trial, nearly 80% are favorable to disclose it in the patient's informed consent. This is a  
19  
20 significant inclination towards transparency among our professional community that has not yet  
21  
22 been translated in regulatory acts by the current legislation regulating clinical trials. This is also  
23  
24 important because physician payment for study participation in clinical trials is a potential COI that  
25  
26 can adversely affect patient trust.<sup>10,31</sup>  
27  
28  
29

30  
31 The median net margin for the employee institution that was considered balanced for each patient  
32  
33 enrolled in an industry trial was €5,000, which appears significantly lower than the current level of  
34  
35 industry per-patient fee, where the gross fee may now easily exceed €30,000. The vast majority of  
36  
37 respondents is also contrary to the current escalating trend to spend more for marketing and  
38  
39 promotion than for research and development by industry, a notion which is rarely openly declared  
40  
41 by industry.<sup>15,16</sup> These considerations suggest that the surveyed sample is aware that the current  
42  
43 trend to increasing costs also has a negative impact on quality of care once the drug is licensed. In  
44  
45 the United States, cancer patients carry rising burdens of healthcare-related out-of-pocket expenses,  
46  
47 and a growing number of patients are considered underinsured. To save money, a large proportion  
48  
49 of these patients take less or nothing of the prescribed medications, a phenomenon known as  
50  
51 financial toxicity, which has also been described in the context of the Italian healthcare system.<sup>19,32</sup>  
52  
53

54  
55 Nearly 80% consider it unfair be co-author of an article written by a medical writer for an industry-  
56  
57 sponsored trial when no substantial scientific contribution has been made. This is in contrast to the  
58

1  
2  
3 present trend of most industry-sponsored trials to be reported by medical writers, often in  
4 concomitance with presentation at premier international meetings.<sup>11</sup> The legal and ethical  
5 consequences of ghost writing, including risk of plagiarism and loss of professionalism and genuine  
6 intellectual contribution to the advancement of science, is a subject of intense debate<sup>33,34</sup>  
7  
8  
9

10  
11  
12 Over 70% of the oncologists think their CME should be supported by their institution or public  
13 sources and less than 10% by personal resources. The vast majority stated their first CME tool is  
14 scientific journals but nearly 15% use industry sales representatives as the main CME method.  
15  
16 These findings are in line with the public landscape of our national health system medical doctors,  
17 where CME is considered a right that should be covered by public resources and not a duty to be at  
18 least partially covered by physician resources. Three quarters of Italian oncologists would agree to  
19 be financially supported by industry for travel and lodging at international meetings, another  
20 important source of industry expenditures. It is possible that this form of financial support is  
21 perceived as less conflicting and as the only way to attend important meetings given the scarcity of  
22 public or private no-profit funding.  
23  
24  
25  
26  
27  
28  
29  
30  
31  
32  
33

34 Interestingly, over 70% believe that COI disclosure during presentations does not attenuate the risk  
35 of scientific bias. A recent study<sup>35</sup> also showed that disclosure can be incomplete by using the term  
36 of 'unpaid consultant', whereby many doctors fail to identify research funding, conference fees,  
37 travel expenses or other benefits. However, approximately 60% believe that industry support does  
38 not influence topic selection at meetings and that giving invited speeches does not influence  
39 personal drug prescription.  
40  
41  
42  
43  
44  
45  
46  
47

48 Another important issue raised by our survey is the call for a higher level of transparency by  
49 scientific societies, including annual detailed reporting of industry payments. Prior studies have  
50 shown that disclosure of COI among Italian scientific societies does not attenuate the problem but  
51 in fact seems to be a justification to increase financial relationships.<sup>26</sup>  
52  
53  
54  
55  
56  
57

1  
2  
3 The consequences of financial COI on patient perception has been the subject of recent studies.<sup>8,10,36</sup>  
4  
5 In an ASCO survey of COI policies, the majority of non-physicians and patient advocates felt that  
6  
7 full disclosure of COI by physicians was expected and could be a factor in patients' decisions  
8  
9 regarding therapy.<sup>37</sup>  
10

11  
12 Altogether, the answers to the survey clearly show that the direct economic relationship between clinicians  
13  
14 and industry is deeply rooted in current practice. Money from industry regularly flows as the result of  
15  
16 declared marketing investments in the context of legal pathways. The hidden question is whether a clinician  
17  
18 who receives financial support for various activities in his profession can be impartial and objective in  
19  
20 making clinical decisions. This is particularly true in all those clinical settings where uncertainties about the  
21  
22 added value of new drugs make treatment choices questionable.<sup>17,18,20-22</sup> Most recent evidence indicates that  
23  
24 the majority of cancer drugs registered in Europe by EMA do not show a benefit in term of survival or  
25  
26 quality of life<sup>38</sup>, indicating the necessity to raise the evidence bar before market approval<sup>39</sup>. Moreover, in a  
27  
28 recent analysis of 10 approved cancer drugs in the United States, the median cost of developing a drug was  
29  
30 \$648,000,000, a figure significantly lower than prior estimates. The revenue after four years of approval was  
31  
32 substantial (median, \$1658.4 million; range, \$204.1 million to \$22 275.0 million)<sup>40</sup>, suggesting the need for a  
33  
34 significant reduction of expenses for marketing and promotional activities, including paying doctors for a  
35  
36 variety of activities, to guarantee sustainable health systems. The results of our study are also consistent with  
37  
38 the international research context on this topic<sup>2-7</sup>, underlying the increasing importance of COI on practice<sup>41</sup>  
39  
40 and research<sup>42</sup>.

41  
42 To our knowledge this is the first national survey performed by Italian oncologists and one of the  
43  
44 few prompted by medical oncologists regarding their COI and physician-industry relationships. The  
45  
46 questionnaire in an anonymous form probably favored the disclosure of financial relationships with  
47  
48 industry and an open attitude by respondents. The study has limitations, including the non-random  
49  
50 selection of the respondents and the greater representation of chiefs of staff. A strength of our study,  
51  
52 however, is the relatively large sample size which may overcome the limitations and possibly  
53  
54 reflect the general characteristics of medical oncologists in Italy.<sup>27</sup>  
55  
56  
57

1  
2  
3 Our study indicates that among Italian oncologists COI is perceived as an important issue  
4 influencing education, quality of care, science and costs. The overall view on COI calls for a  
5 process of rethinking of the relationship between clinicians and industry and, most importantly, a  
6 courageous step toward transparency. The results seem to indicate a need for education about the  
7 effect of sponsored education on attitudes and on prescribing behaviour and the extent to which  
8 industry sponsorship affects clinical trial results. However, disclosure cannot be the only answer  
9 and all components of the healthcare system are called into action. Health institutions should  
10 promote and finance professional education and industry should transparently contribute to research  
11 and increase quality of care. Most importantly, we suggest that the financial relationships between  
12 industry and clinicians should always be indirect and mediated by institutions. In the present  
13 context of increasing health care costs and financial toxicity, alternative ways to support education  
14 and research and strict transparency policies could contribute to increased patient trust,  
15 sustainability and equity in health care access. These principles are being proposed in a forthcoming  
16 policy document on COI that will be endorsed by CIPOMO, spread among all Italian oncologists,  
17 and proposed to the Italian health authorities.  
18  
19  
20  
21  
22  
23  
24  
25  
26  
27  
28  
29  
30  
31  
32  
33  
34  
35  
36  
37  
38  
39  
40  
41  
42  
43  
44  
45  
46  
47  
48  
49  
50  
51  
52  
53  
54  
55  
56  
57  
58  
59  
60

Table 1. Main respondent characteristics

|                                                     | <i>No. (%)</i> |
|-----------------------------------------------------|----------------|
| Geographic Area                                     |                |
| North                                               | 161 (50.2%)    |
| Center                                              | 108 (33.6%)    |
| South                                               | 52 (16.2%)     |
| Age in years                                        |                |
| < 45                                                | 103 (32.1%)    |
| 45 - 59                                             | 133 (41.4%)    |
| ≥ 60                                                | 85 (26.5%)     |
| Sex*                                                |                |
| Male                                                | 170 (53.3%)    |
| Female                                              | 149 (46.7%)    |
| Place of Work                                       |                |
| Hospital                                            | 283 (88.2%)    |
| University                                          | 20 (6.2%)      |
| Research Institute                                  | 11 (3.4%)      |
| Other                                               | 7 (2.2%)       |
| Nature of Institution                               |                |
| Public                                              | 296 (92.2%)    |
| Private                                             | 25 (7.8%)      |
| Job Position                                        |                |
| Assistant Chief                                     | 190 (59.2%)    |
| Chief                                               | 98 (30.5%)     |
| Other                                               | 33 (10.3%)     |
| Years of Experience                                 |                |
| <15                                                 | 88 (27.4%)     |
| ≥15                                                 | 233 (72.6%)    |
| Direct payment from industries in the last 3 years* |                |
| No                                                  | 120 (37.6%)    |
| Yes                                                 | 199 (62.4%)    |

\*Two oncologists did not answer the question

Table 2. Subgroup analysis on question # 1: Do you believe most oncologists have direct conflict of interests with pharmaceutical companies?

|                                      | Disagree |      | Agree |      | <i>P</i> < * |
|--------------------------------------|----------|------|-------|------|--------------|
|                                      | no.      | %    | no.   | %    |              |
| <b>Country area</b>                  |          |      |       |      |              |
| North                                | 112      | 69.6 | 49    | 30.4 | 0.440        |
| Center                               | 68       | 63.0 | 40    | 37.0 |              |
| South                                | 37       | 71.2 | 15    | 28.8 |              |
| <b>Sex</b>                           |          |      |       |      | <b>0.001</b> |
| F                                    | 84       | 56.4 | 65    | 43.6 |              |
| M                                    | 131      | 77.1 | 39    | 22.9 |              |
| <b>Age</b>                           |          |      |       |      | 0.057        |
| < 45                                 | 61       | 59.2 | 42    | 40.8 |              |
| 45 — 59                              | 92       | 69.2 | 41    | 30.8 |              |
| ≥ 60                                 | 64       | 75.3 | 21    | 24.7 |              |
| <b>Workplace</b>                     |          |      |       |      | 0.583        |
| Research Institute                   | 9        | 81.8 | 2     | 18.2 |              |
| Hospital                             | 189      | 66.8 | 94    | 33.2 |              |
| University                           | 15       | 75.0 | 5     | 25.0 |              |
| Other                                | 4        | 57.1 | 3     | 42.9 |              |
| <b>Type of structure</b>             |          |      |       |      | 0.350        |
| Private                              | 19       | 76.0 | 6     | 24.0 |              |
| Public                               | 198      | 66.9 | 98    | 33.1 |              |
| <b>Job position</b>                  |          |      |       |      | <b>0.021</b> |
| Assistant chief                      | 119      | 62.6 | 71    | 37.4 |              |
| Chief                                | 77       | 78.6 | 21    | 21.4 |              |
| Other                                | 21       | 63.6 | 12    | 36.4 |              |
| <b>Years of experience</b>           |          |      |       |      | <b>0.023</b> |
| < 15                                 | 51       | 58.0 | 37    | 42.0 |              |
| ≥ 15                                 | 166      | 71.2 | 67    | 28.8 |              |
| <b>Direct payments from industry</b> |          |      |       |      | <b>0.029</b> |
| No                                   | 72       | 60.0 | 48    | 40.0 |              |
| Yes                                  | 143      | 71.9 | 56    | 28.1 |              |

\*Referred to bidirectional chi-square test

Table 3. Subgroup analysis on the question: “Have you received any payment to speak at educational meetings sponsored by a pharmaceutical company in the last 3 years?”

|                            | <i>No</i>  |          | <i>Yes</i> |          | <i>P</i> < * |
|----------------------------|------------|----------|------------|----------|--------------|
|                            | <i>no.</i> | <i>%</i> | <i>no.</i> | <i>%</i> |              |
| <b>Country area</b>        |            |          |            |          | <b>0.002</b> |
| North                      | 57         | 35.4     | 104        | 64.6     |              |
| Center                     | 52         | 49.1     | 54         | 50.9     |              |
| South                      | 11         | 21.1     | 41         | 78.9     |              |
| <b>Sex</b>                 |            |          |            |          | <b>0.002</b> |
| F                          | 69         | 46.6     | 79         | 53.4     |              |
| M                          | 51         | 30.0     | 119        | 70.0     |              |
| <b>Age</b>                 |            |          |            |          | 0.715        |
| < 45                       | 41         | 39.8     | 62         | 60.2     |              |
| 45 — 59                    | 50         | 38.2     | 81         | 61.8     |              |
| ≥ 60                       | 29         | 34.1     | 56         | 65.8     |              |
| <b>Workplace</b>           |            |          |            |          | <b>0.003</b> |
| Research Institute         | 0          | 0.0      | 11         | 100.0    |              |
| Hospital                   | 106        | 37.6     | 176        | 62.4     |              |
| University                 | 8          | 42.1     | 11         | 57.9     |              |
| Other                      | 6          | 85.7     | 1          | 14.3     |              |
| <b>Type of structure</b>   |            |          |            |          | 0.493        |
| Private                    | 11         | 44.0     | 14         | 56.0     |              |
| Public                     | 109        | 37.1     | 185        | 62.9     |              |
| <b>Job position</b>        |            |          |            |          | <b>0.016</b> |
| Assistant chief            | 72         | 38.3     | 116        | 61.7     |              |
| Chief                      | 29         | 29.6     | 69         | 70.4     |              |
| Other                      | 19         | 57.6     | 14         | 42.4     |              |
| <b>Years of experience</b> |            |          |            |          | 0.314        |
| < 15                       | 37         | 42.0     | 51         | 58.0     |              |
| ≥ 15                       | 83         | 35.9     | 148        | 64.1     |              |

\*Referred to bidirectional chi-square test

Table 4. Role of public entities and private industry in continuous medical education (CME) support.

|                                                                                                                                                                                                                                                                                                                               | <b>No. of important or very important score 4+5 (%)</b>                                                   |
|-------------------------------------------------------------------------------------------------------------------------------------------------------------------------------------------------------------------------------------------------------------------------------------------------------------------------------|-----------------------------------------------------------------------------------------------------------|
| <b>Questions</b>                                                                                                                                                                                                                                                                                                              |                                                                                                           |
| <p>1. Which method do you primarily use for your CME? You can select multiple choices and attribute different scores from “not at all important” (1) to “very important” (5).</p> <p>Medical websites</p> <p>Scientific journals</p> <p>CME courses</p> <p>Conferences</p> <p>Pharmaceutical representatives</p> <p>Books</p> | <p>185 (60.8)</p> <p>278 (89.1)</p> <p>181 (59.5)</p> <p>211 (67.4)</p> <p>42 (13.7)</p> <p>62 (20.9)</p> |
| <p>2. Who should pay for your CME? You can select multiple choices and attribute different scores from “not at all important” (1) to “very important” (5).</p> <p>- Myself</p> <p>- Hospital</p> <p>- Public Institutions</p> <p>- Pharmaceutical companies</p> <p>- Research Foundations</p>                                 | <p>27 (9.3)</p> <p>256 (83.1)</p> <p>211 (70.3)</p> <p>51 (17.3)</p> <p>140 (48.1)</p>                    |



1  
2  
3 Figure Legend. Figure 1: Questions and answers evaluated with a 4-point Likert scale on CoI (%)  
4  
5  
6  
7  
8  
9  
10  
11  
12  
13  
14  
15  
16  
17  
18  
19  
20  
21  
22  
23  
24  
25  
26  
27  
28  
29  
30  
31  
32  
33  
34  
35  
36  
37  
38  
39  
40  
41  
42  
43  
44  
45  
46  
47  
48  
49  
50  
51  
52  
53  
54  
55  
56  
57  
58  
59  
60

For peer review only

## ACKNOWLEDGMENT

The Authors wish to thank Katherine Brandt for reviewing the English and Cristina Giua and Tania Buttiron Webber for technical assistance.

### Contributors

ADC, GN, FR: idea, planning data set, data analysis, wrote the manuscript.

EB, BR, VL: planning data set, statistical analysis, wrote the manuscript.

FA, LF, CV: discussion of results.

MT, MC: discussion of results, standing funding.

**Competing interests:** none

**Ethics approval:** not applicable

**Provenance and peer review:** not commissioned; externally peer reviewed.

**Data sharing statement:** All data are stored in the server of CIPOMO and are available on request.

**REFERENCES**

1. Stead WW. The Complex and Multifaceted Aspects of Conflicts of Interest. *JAMA*.2017;317(17):1765-1767.
2. McCarthy M. PubMed is urged to include competing interest information in abstracts. *BMJ*. 2016 Apr 7;353:i2018. doi: 10.1136/bmj.i2018. PubMed PMID: 27056448.
3. McCarthy M. US doctors earn speaking and consulting fees from drug companies that sponsor their research. *BMJ*. 2014 Mar 27;348:g2410. doi: 10.1136/bmj.g2410. PubMed PMID: 24677695.
4. Lundh A, Lexchin J, Mintzes B, Schroll JB, Bero L. Industry sponsorship and research outcome. *Cochrane Database Syst Rev*. 2017. 2017 Feb 16;2:MROOOO33.
5. Ahn R, Woodbridge A, Abraham A et al. Financial ties of principal investigators and randomized controlled trial outcomes: cross sectional study. *BMJ*. 2017 Jan 17;356:i6770. doi: 10.1136/bmj.i6770. PubMed PMID: 28096109; PubMed Central PMCID: PMC5241252.
6. Mitchell AP, Basch EM, Dusetzina SB. Financial Relationships With Industry Among National Comprehensive Cancer Network Guideline Authors. *JAMA Oncol*. 2016; 2(12):1628-1631.
7. Wise J. Still too little transparency among guideline writers and others. *BMJ*. 2017 Jan 17;356:j276. doi: 10.1136/bmj.j276. PubMed PMID: 28096172.
8. Hampson LA, Agrawal M, Joffe S, Gross CP, Verter J, Emanuel EJ. Patients' views on financial conflicts of interest in cancer research trials. *N Engl J Med*. 2006;355(22):2330-7.
9. Holbrook A, Lexchin J, Pullenayegum E et al. What do Canadians think about physician-pharmaceutical industry interactions? *Health Policy*. 2013;112(3):255-63.
10. Klein E, Solomon AJ, Corboy J, Bernat J. Physician compensation for industry-sponsored clinical trials in multiple sclerosis influences patient trust. *Mult Scler Relat Disord*. 2016;8:4-8.
11. Moy B, Bradbury AR, Helft PR, Egleston BL, Sheikh-Salah M, Peppercorn J. Correlation between financial relationships with commercial interests and research prominence at an oncology meeting. *J Clin Oncol*. 2013 Jul 20;31(21):2678-84.

- 1  
2  
3 12. Lundh A, Barbateskovic M, Hróbjartsson A, Gøtzsche PC. Conflicts of interest at medical journals:  
4 the influence of industry-supported randomised trials on journal impact factors and revenue - cohort  
5 study. PLoS Med. 2010 Oct 26;7(10):e1000354. Erratum in: PLoS Med. 2011 Feb;8(2).  
6  
7
- 8  
9 13. Global Oncology Trend Report a Review of 2015 and Outlook to 2020. IMS Institute for healthcare  
10 information. [http://www.imshealth.com/en/thought-leadership/quintilesims-institute/reports/global-](http://www.imshealth.com/en/thought-leadership/quintilesims-institute/reports/global-oncology-trend-report-a-review-of-2015-and-outlook-to-2020)  
11 [oncology-trend-report-a-review-of-2015-and-outlook-to-2020](http://www.imshealth.com/en/thought-leadership/quintilesims-institute/reports/global-oncology-trend-report-a-review-of-2015-and-outlook-to-2020).  
12  
13  
14
- 15 14. Saltz LB. Perspectives on Cost and Value in Cancer Care. JAMA Oncol. 2016;2(1):19-21.  
16
- 17 15. Laurance J. Makers of anticancer drugs are "profiteering," say 100 specialists from around the world.  
18 BMJ. 2013;346:f2810  
19
- 20 16. Anderson R. Pharmaceutical industry gets high on fat profits. By Business reporter, BBC News 6  
21 November 2014. <http://www.bbc.com/news/business-28212223>  
22  
23
- 24 17. Cressman S, Browman GP, Hoch JS, Kovacic L, Peacock SJ. A Time-Trend Economic Analysis of  
25 Cancer Drug Trials. Oncologist. 2015;20(7):729-36.  
26  
27
- 28 18. Mailankody S, Prasad V. Five Years of Cancer Drug Approvals: Innovation, Efficacy, and Costs.  
29 JAMA Oncol. 2015;1(4):539-40. Erratum in: JAMA Oncol. 2015 Jul;1(4):544.  
30  
31
- 32 19. Zafar SY, Peppercorn JM, Schrag D et al. The financial toxicity of cancer treatment: a pilot study  
33 assessing out-of-pocket expenses and the insured cancer patient's experience. Oncologist.  
34 2013;18(4):381-90.  
35  
36  
37
- 38 20. Kantarjian HM, Fojo T, Mathisen M, Zwelling LA. Cancer drugs in the United States: Justum  
39 Pretium--the just price. J Clin Oncol. 2013;31(28):3600-4. Erratum in: J Clin Oncol.  
40 2015;33(30):3523.  
41  
42  
43
- 44 21. Pfister DG. The just price of cancer drugs and the growing cost of cancer care: oncologists need to  
45 be part of the solution. J Clin Oncol. 2013;31(28):3487-9.  
46  
47
- 48 22. Fricker J. New NICE criteria for drug access. Lancet Oncol. 2017;18(5):576.  
49
- 50 23. Jimenez J. Why the Approach to Drug Pricing Has to Change Now. 2016.  
51 [https://www.forbes.com/sites/sciencebiz/2016/11/01/why-the-approach-to-drug-pricing-has-to-](https://www.forbes.com/sites/sciencebiz/2016/11/01/why-the-approach-to-drug-pricing-has-to-change-now/#62f0330657fc)  
52 [change-now/#62f0330657fc](https://www.forbes.com/sites/sciencebiz/2016/11/01/why-the-approach-to-drug-pricing-has-to-change-now/#62f0330657fc).  
53  
54  
55  
56  
57

- 1  
2  
3 24. Chimonas S, DeVito NJ, Rothman DJ. Bringing Transparency to Medicine: Exploring Physicians'  
4 Views and Experiences of the Sunshine Act. *Am J Bioeth.* 2017;17(6):4-18.  
5  
6  
7 25. Lenzer J, Brownlee S. Diverting attention from financial conflicts of interest. *BMJ.* 2015 Jun  
8 30;350:h3505. doi: 10.1136/bmj.h3505. PubMed PMID: 26129927.  
9  
10  
11 26. Fabbri A, Gregoraci G, Tedesco D et al. Conflict of interest between professional medical societies  
12 and industry: a cross-sectional study of Italian medical societies' websites. *BMJ Open.*  
13 2016.1;6(6):e011124. Erratum in: *BMJ Open.* 2016;6(6):e011124corr1.  
14  
15  
16 27. Libro bianco VI edizione. Milan, Italy: Associazione Italiana di Oncologia Medica; 2015.  
17 [http://www.aiom.it/libro-bianco-2015/professionisti/documenti-scientifici/pubblicazioni/libro-  
19 bianco-2015/libro-bianco-2015/1,759,1](http://www.aiom.it/libro-bianco-2015/professionisti/documenti-scientifici/pubblicazioni/libro-<br/>18 bianco-2015/libro-bianco-2015/1,759,1)  
20  
21  
22 28. Rose SL, Krzyzanowska MK, Joffe S. Relationships between authorship contributions and authors'  
23 industry financial ties among oncology clinical trials. *J Clin Oncol.* 2010 Mar 10;28(8):1316-21.  
24  
25  
26 29. Tringale KR, Marshall D, Mackey TK, Connor M, Murphy JD, Hattangadi-Gluth JA. Types and  
27 Distribution of Payments From Industry to Physicians in 2015. *JAMA.* 2017;317(17):1774-1784.  
28  
29  
30 30. Marshall DC, Moy B, Jackson ME, Mackey TK, Hattangadi-Gluth JA. Distribution and Patterns of  
31 Industry-Related Payments to Oncologists in 2014. *J Natl Cancer Inst.* 2016;108(12).  
32  
33  
34 31. Wen L. Patients can't trust doctors' advice if we hide our financial connections with drug companies.  
35 *BMJ.* 2014 Jan 15;348:g167. doi: 10.1136/bmj.g167. Review. PubMed PMID: 24430529.  
36  
37  
38 32. Perrone F, Jommi C, Di Maio M et al. The association of financial difficulties with clinical outcomes  
39 in cancer patients: secondary analysis of 16 academic prospective clinical trials conducted in Italy.  
40 *Ann Oncol.* 2016Dec;27(12):2224-2229. doi: 10.1093/annonc/mdw433.  
41  
42  
43 33. Das N, Panjabi M. Plagiarism: Why is it such a big issue for medical writers? Perspectives in  
44 *Clinical Research.* 2011;2(2):67-71.  
45  
46  
47 34. Wislar JS, Flanagin A, Fontanarosa PB, Deangelis CD. Honorary and ghost authorship in high  
48 impact biomedical journals: a cross sectional survey. *BMJ.* 2011;343:d6128.  
49  
50  
51 35. Menkes DB, Masters JD, Bröring A, Blum A. What Does 'Unpaid Consultant' Signify? A Survey of  
52 Euphemistic Language in Conflict of Interest Declarations. *J Gen Intern Med.* 2018; 33(2):139-141.  
53  
54  
55  
56  
57  
58  
59  
60

- 1  
2  
3 36. Wong YN, Schluchter MD, Albrecht TL et al. Financial Concerns About Participation in Clinical  
4 Trials Among Patients With Cancer. *J Clin Oncol*. 2016 Feb 10;34(5):479-87.  
5  
6  
7 37. Lockhart AC, Brose MS, Kim ES et al. Physician and stakeholder perceptions of conflict of interest  
8 policies in oncology. *J Clin Oncol*. 2013;31(13):1677-82.  
9  
10  
11 38. Davis C, Naci H, Gurpinar E, Poplavska E, Pinto A, Aggarwal A. Availability of evidence of  
12 benefits on overall survival and quality of life of cancer drugs approved by European Medicines  
13 Agency: retrospective cohort study of drug approvals 2009-13. *BMJ*. 2017 Oct 4;359:j4530.  
14  
15  
16 39. Cohen D. Cancer drugs: high price, uncertain value. *BMJ*. 2017 Oct 4;359:j4543. doi:  
17 10.1136/bmj.j4543.  
18  
19  
20 40. Prasad V, Mailankody S. Research and Development Spending to Bring a Single Cancer Drug to  
21 Market and Revenues After Approval. *JAMA Intern Med*. 2017 Sep 11. doi:  
22 10.1001/jamainternmed.2017.3601  
23  
24  
25  
26 41. Campbell EG, Gruen RL, Mountford J, Miller LG, Cleary PD, Blumenthal D. A national survey of  
27 physician-industry relationships. *N Engl J Med*. 2007 Apr 26;356(17):1742-50.  
28  
29  
30 42. Rasmussen K, Schroll J, Götzsche PC, Lundh A. Under-reporting of conflicts of interest among  
31 trialists: a cross-sectional study. *J R Soc Med*. 2015;108(3):101-7  
32  
33  
34  
35  
36  
37  
38  
39  
40  
41  
42  
43  
44  
45  
46  
47  
48  
49  
50  
51  
52  
53  
54  
55  
56  
57  
58  
59  
60

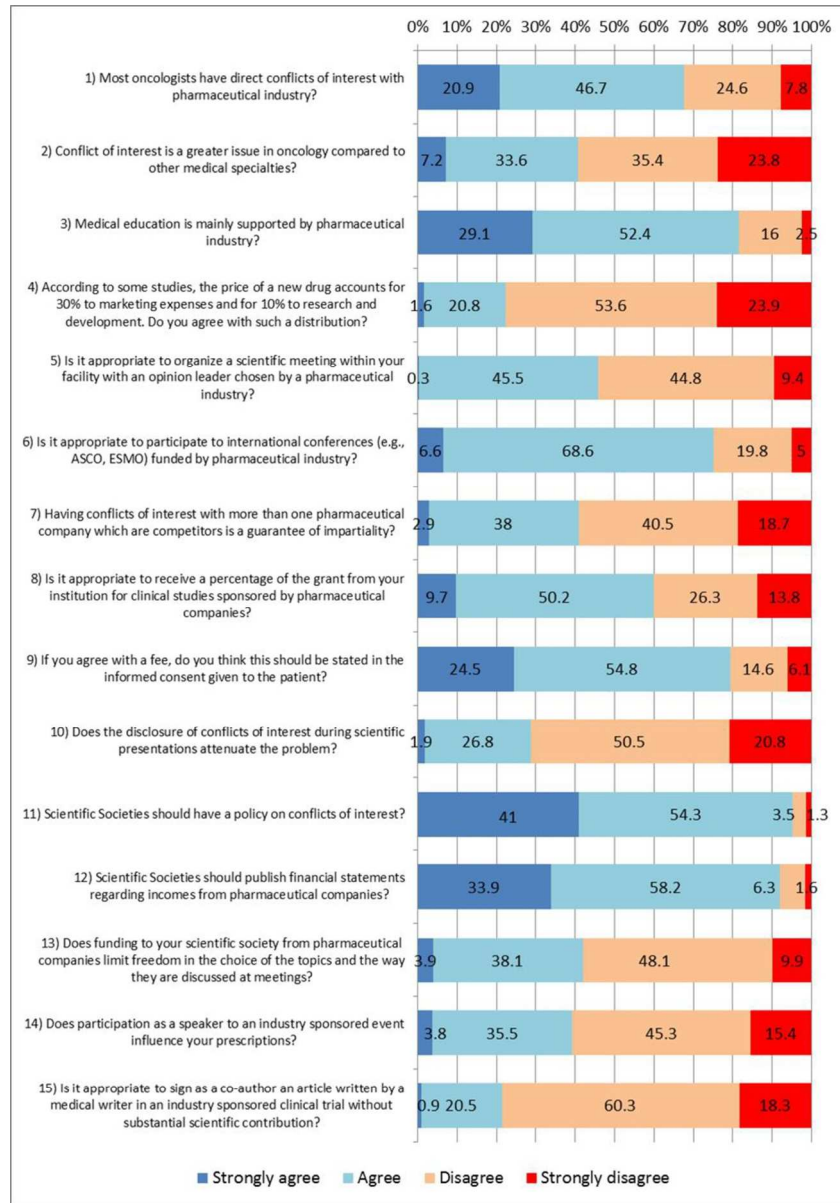

Figure 1: Questions and answers evaluated with a 4-point Likert scale on CoI (%)

106x151mm (300 x 300 DPI)

# BMJ Open

## Conflict of interest among Italian medical oncologists. A national survey

|                                 |                                                                                                                                                                                                                                                                                                                                                                                                                                                                                                                                                                                                                                                                                                                                                                                                                           |
|---------------------------------|---------------------------------------------------------------------------------------------------------------------------------------------------------------------------------------------------------------------------------------------------------------------------------------------------------------------------------------------------------------------------------------------------------------------------------------------------------------------------------------------------------------------------------------------------------------------------------------------------------------------------------------------------------------------------------------------------------------------------------------------------------------------------------------------------------------------------|
| Journal:                        | <i>BMJ Open</i>                                                                                                                                                                                                                                                                                                                                                                                                                                                                                                                                                                                                                                                                                                                                                                                                           |
| Manuscript ID                   | bmjopen-2017-020912.R2                                                                                                                                                                                                                                                                                                                                                                                                                                                                                                                                                                                                                                                                                                                                                                                                    |
| Article Type:                   | Research                                                                                                                                                                                                                                                                                                                                                                                                                                                                                                                                                                                                                                                                                                                                                                                                                  |
| Date Submitted by the Author:   | 03-Apr-2018                                                                                                                                                                                                                                                                                                                                                                                                                                                                                                                                                                                                                                                                                                                                                                                                               |
| Complete List of Authors:       | DeCensi, Andrea; E.O. Ospedali Galliera, S.C. Oncologia Medica; Wolfson Institute of Preventive Medicine<br>Numico, Gianmauro; Division of Medical Oncology, SS. Antonio e Biagio Hospital<br>Ballatori, Enzo; Medical Statistician, Spinetoli<br>Artioli, Fabrizio; Department of Oncology, Carpi and Mirandola Hospitals<br>Clerico, Mario; Department of Medical Oncology, Hospital of Biella; President, CIPOMO<br>Fioretto, Luisa; Department of Oncology, S.M. Annunziata Hospital Livellara, Virginia; Division of Medical Oncology, Galliera Hospital<br>Ruggeri, Benedetta; Clinical Governance, Area Vasta 5, ASUR Marche<br>Tomirotti, Maurizio; CIPOMO Past President<br>Verusio, Claudio; Division of Medical Oncology, ASST Valleolona<br>Roila, Fausto; Division of Medical Oncology, Ospedale Santa Maria |
| <b>Primary Subject Heading</b>: | Ethics                                                                                                                                                                                                                                                                                                                                                                                                                                                                                                                                                                                                                                                                                                                                                                                                                    |
| Secondary Subject Heading:      | Oncology, Health policy, Medical education and training, Medical publishing and peer review                                                                                                                                                                                                                                                                                                                                                                                                                                                                                                                                                                                                                                                                                                                               |
| Keywords:                       | conflict of interest, survey oncologist, physician industry relationship, cancer drug prices, ghost writing                                                                                                                                                                                                                                                                                                                                                                                                                                                                                                                                                                                                                                                                                                               |
|                                 |                                                                                                                                                                                                                                                                                                                                                                                                                                                                                                                                                                                                                                                                                                                                                                                                                           |

SCHOLARONE™  
Manuscripts



Original Article: **Conflict of interest among Italian medical oncologists. A national survey.**

Andrea DeCensi<sup>1,2</sup>, Gianmauro Numico<sup>3</sup>, Enzo Ballatori<sup>4</sup>, Fabrizio Artioli<sup>5</sup>, Mario Clerico<sup>6</sup>, Luisa Fioretto<sup>7</sup>, Virginia Livellara<sup>1</sup>, Benedetta Ruggeri<sup>8</sup>, Maurizio Tomirotti<sup>9</sup>, Claudio Verusio<sup>10</sup> and Fausto Roila<sup>11</sup> on behalf of the Italian College of Chief Medical Oncologists (CIPOMO).

<sup>1</sup>Division of Medical Oncology, Galliera Hospital, Genoa, Italy;

<sup>2</sup>Wolfson Institute of Preventive Medicine, Queen Mary University of London, UK;

<sup>3</sup>Division of Medical Oncology, SS. Antonio e Biagio Hospital, Alessandria, Italy;

<sup>4</sup>Medical Statistician, Spinetoli, Ascoli Piceno, Italy;

<sup>5</sup>Department of Oncology, Carpi and Mirandola Hospitals;

<sup>6</sup>Department of Medical Oncology, Hospital of Biella, Italy; President, CIPOMO;

<sup>7</sup>Department of Oncology, S.M. Annunziata Hospital, Florence, Italy;

<sup>8</sup>Clinical Governance, Area Vasta 5, ASUR Marche, Italy;

<sup>9</sup>CIPOMO Past President;

<sup>10</sup>Division of Medical Oncology, ASST Valleolona, Saronno, Italy;

<sup>11</sup>Division of Medical Oncology, Ospedale Santa Maria, Terni, Italy.

**Running title:** Italian oncologists and conflict of interest

**Keywords:** conflict of interest; survey oncologist; physician industry relationship; cancer drug prices; ghost writing.

**Financial support:** The Italian College of Medical Oncology Chiefs (CIPOMO) supported online questionnaire set up but the content of the paper does not necessarily represent its view.

**Disclosure:** The authors indicate no potential conflict of interest

**Corresponding author:** Dr Andrea DeCensi, Division of Medical Oncology, E.O. Ospedali Galliera, Mura delle Cappuccine 14, Genoa, 16128, Italy; tel.: +39 0105634501; fax: +39 01057481090; e-mail: [andrea.decensi@galliera.it](mailto:andrea.decensi@galliera.it)

**Word count:** 3391

## ARTICLE SUMMARY

### **ABSTRACT 300 words**

#### **Objective**

To assess the Italian medical oncologist's opinion regarding the implications of conflict of interest (COI) on medical education, care and research and to evaluate their direct financial relationships.

#### **Design**

National cross-sectional survey conducted between March and April 2017 among Italian oncologists.

#### **Setting**

Online survey sponsored by the Italian College of Medical Oncology Chiefs through its web site.

#### **Participants:**

Italian oncologists who filled out an anonymous questionnaire including 19 items and individual and working characteristics.

#### **Main outcome measures**

The proportion of medical oncologists perceiving COI as an outstanding issue and those receiving direct payments from industry.

#### **Results**

The number of responders were 321, representing 13% of Italian tenured medical oncologists. Overall, 62% declared direct payments from pharmaceutical industry in the last 3 years. Sixty-eight percent felt the majority of Italian oncologists have a COI with industry but 59% suppose this is not greater than that of other specialties. Eighty-two percent consider that most oncology education is supported by industry. More than 75% believe that current allocation of industry budget on marketing and promotion rather than research and development is unfair but 75% consider it appropriate to receive travel and lodging hospitality from industry. A median net profit margin of 5.000€ per patient enrolled in an industry trial was considered appropriate for the employee institution. Sixty percent agree to receive a personal fee for patients enrolled in industry trials but 79% state this should be reported in the informed consent. Over 90% believe that scientific societies

1  
2  
3 should publish a financial report of industry support. Finally, 79% disagree to being co-author of an  
4 article written by a medical writer when no substantial scientific contribution is made.  
5

## 6 **Conclusions**

7  
8  
9 Among Italian oncologists COI is perceived as an important issue influencing costs, education, care  
10 and science. A more rigorous policy on COI should be implemented.  
11  
12  
13  
14  
15  
16  
17  
18  
19  
20  
21  
22  
23  
24  
25  
26  
27  
28  
29  
30  
31  
32  
33  
34  
35  
36  
37  
38  
39  
40  
41  
42  
43  
44  
45  
46  
47  
48  
49  
50  
51  
52  
53  
54  
55  
56  
57  
58  
59  
60

For peer review only

## STRENGTHS AND LIMITATIONS OF THIS STUDY

- This is the first national survey performed by Italian oncologists and one of the few prompted by medical oncologists regarding their conflict of interest and physician-industry relationships in Europe.
- The sample size of 321 is quite large, as it represents 13% of the 2,260 tenured Italian certified medical oncologists from the 319 Units of the country, making the results of the survey well founded.
- Another strength of the questionnaire is its anonymous form which favored the disclosure of financial relationships with industry and an open attitude by respondents.
- The study has limitations, including the non-random selection of the respondents and the greater representation of chiefs of staff compared with the overall population of medical oncologists.

## INTRODUCTION

A conflict of interest (COI) exists when professional judgment concerning a primary interest such as patient welfare or the validity of research may be influenced by a secondary interest such as financial gain or career advancement. Financial relationships between industry and physicians and/or researchers are common and may be direct, consisting of stock options, advisory fees, honoraria, speaking fees, travel and lodging expenses, or indirect, such as research support to researcher's institutions. COI increasingly affects every aspect of medicine, including care, education, research integrity, patient trust, guideline formulation, regulatory approval and scientific prominence.<sup>1-7</sup>

Collaboration between industry and clinicians and/or researchers creates challenges and opportunities. While these relationships may contribute to advancement in the field, there is a need to better understand the negative consequences of COI and how best to report and manage it. Systematic reviews have found that pharmaceutical industry- sponsored studies are more often favorable to the sponsor's product compared with studies having other sources of sponsorship.<sup>4,5</sup> Public opinion on physician-pharmaceutical industry interactions differs depending on context and specific country health care models<sup>8,9</sup>, but some studies suggest a significant level of concern regarding interaction involving direct financial benefit to physicians.<sup>9,10</sup>

In medical oncology, financial relationships have increased through the years and have influenced clinical research, scientific prominence and visibility.<sup>11,12</sup> The issue is particularly important given the increasing volume of investments made by the pharmaceutical industry in cancer treatment.<sup>13</sup> In this price increase strategy<sup>14</sup>, pharmaceutical companies tend to spend much more for marketing and promotional activities than for research and development.<sup>15,16</sup> Evaluation of the clinical benefits that oncology drugs offer as a function of their cost has become complex and for some clinical

1  
2  
3 indications, health benefits are diminishing over time<sup>17</sup>. Moreover, these benefits do not always  
4 follow criteria of innovation<sup>18</sup> and provide increasing financial toxicity to patients.<sup>19</sup> There is  
5 concern that the substantial increase in drug prices may hamper both universal and private health  
6 care systems sustainability in many countries<sup>14, 20-22</sup>, while this is also of concern to top managers  
7 of pharmaceutical industries.<sup>23</sup>

8  
9  
10  
11  
12  
13  
14 The debate on COI has received attention in the United States since the introduction of the  
15 Physician Payments Sunshine Act (PPSA), which requires health care product manufacturers to  
16 report payments of more than \$10 to physicians to the federal government. Together with  
17 transparency, PPSA may increase medical professionalism, but it has received mixed opinions  
18 among physicians and experts in the field of COI.<sup>24,25</sup> Conversely, little is known about the opinion  
19 of medical doctors in universal health systems such as those in Europe. A recent survey conducted  
20 in Italy showed that industry sponsorship of medical conferences is common, while the presence of  
21 a structured regulatory system is not. Disclosure of industry funding to medical societies was very  
22 limited.<sup>26</sup>

23  
24  
25  
26  
27  
28  
29  
30  
31  
32  
33  
34 To ascertain the Italian situation, we assessed the opinion of Italian medical oncologists on different  
35 aspects and implications of COI in a national survey.

## 36 37 38 39 40 41 42 **METHODS**

43  
44  
45 The Italian College of Medical Oncology Chiefs (CIPOMO) set up an online national cross-  
46 sectional survey of its members. CIPOMO accounts for 184 chiefs of hospital oncology  
47 divisions/departments. Questionnaires were not sent directly to CIPOMO members. We used a  
48 passive approach to avoid intrusive claims, given the sensitivity of the topic, so the denominators  
49 are unknown. The survey was posted on the CIPOMO website for 6 weeks and three reminder  
50 emails were sent to the regional delegates of CIPOMO to advertise the survey and to involve  
51  
52  
53  
54  
55  
56  
57  
58  
59  
60

1  
2  
3 collaborators. Medical oncologists working in research institutions and university hospitals do not  
4 belong to CIPOMO but those willing to participate who were informed by word of mouth were not  
5 excluded from the survey.  
6  
7

8  
9  
10 The questionnaire was authored by three members of CIPOMO and was based on outstanding  
11 issues in the oncology community and reviewed by eight members of the CIPOMO board of  
12 directors. After approval, the questionnaire was written using the “SurveyMonkey” platform  
13 ([www.surveymonkey.com](http://www.surveymonkey.com)) and presented on line from March 1 to April 15, 2017. CIPOMO  
14 members were reminded to complete the survey through three repeated email messages.  
15  
16 Completion of the survey was anonymous although baseline information (country area, age, sex,  
17 duration of oncology experience, type of institution and position) was requested before proceeding.  
18  
19 Ethics approval was not required because the research survey was considered morally acceptable  
20 and could not risk harming the study participants. Moreover, Italian legislation does not require  
21 ethics approval for research not involving patients.  
22  
23  
24  
25  
26  
27  
28  
29  
30

31  
32 The survey was composed of 19 questions investigating feelings, opinions and experience of the  
33 respondents on different aspects of COI (Figure 1 and text). These include the following areas: the  
34 influence of COI in medical oncology and drug pricing; influence of the drug industry on  
35 continuing medical education; the percentage of direct payments from industry; the acceptability of  
36 travel and lodging coverage by industry and per-patient fee for clinical trials and its disclosure in  
37 the informed consent; the payment amount of per-patient fee to the institution for a trial; the role of  
38 disclosure as a deterrent of COI; the influence of COI on scientific societies; the influence of COI  
39 on drug prescriptions; the opinion on ghost writing in scientific articles. Main outcome measures  
40 were the proportion of medical oncologists perceiving COI as an outstanding issue and those  
41 receiving direct payments from industry.  
42  
43  
44  
45  
46  
47  
48  
49  
50  
51  
52  
53

54 Respondents were requested to quantify in a 4-point Likert scale the extent to which they agreed  
55 with the proposed questions or statements. In the analysis, 17 answers were grouped to facilitate  
56  
57  
58

1  
2  
3 understanding of results (i.e., “strongly agree” plus “agree” *versus* “strongly disagree” plus  
4 “disagree”). One item on net profit margin led to an answer as a continuous variable, whereas  
5 another item on direct payment was dichotomized (Yes, No).  
6  
7  
8  
9

### 10 **Statistical analysis**

11  
12 Answers were collected by the online platform and transformed in a data sheet for analysis.  
13  
14 Descriptive statistics (number, percentage) were used to show both the respondent characteristics  
15 and the general results. Moreover, an exploratory analysis for subgroups was performed considering  
16 the following explicative variables: geographic area (north, center, south), sex (male, female), age  
17 (< 45, 45-59, ≥ 60 years), place of work (hospital, university, research institute, other), nature of  
18 institution (public, private), job position (assistant chief, chief, other), years of oncology experience  
19 (< 15, ≥ 15), direct payment from industry in the last three years (No, Yes). All answers to the  
20 questionnaire items were in turn used as dependent variables. Due the explorative purpose of the  
21 analysis, no adjustment for Bonferroni’s inequality was made. Given the cross-sectional nature of  
22 the study, where the responders were not randomly chosen, bidirectional chi-square tests assuming  
23 alpha=0.05 as significance level were calculated to provide a measure of the strength of association  
24 and not with inferential purposes. A sample size of at least 220 respondents was considered  
25 adequate as it represents 10% of the total medical oncologist population in Italy.  
26  
27  
28  
29  
30  
31  
32  
33  
34  
35  
36  
37  
38  
39  
40

### 41 **Patient and public involvement**

42  
43 The issues of increasing health care costs and of a trustful relationship between patients and  
44 physicians were the main reasons of the survey and were highlighted in the introduction section.  
45  
46 Neither patients nor public were involved in this study. The findings of the survey will be  
47 disseminated through a press release and media coverage. A position paper on COI by CIPOMO is  
48 under preparation.  
49  
50  
51  
52  
53  
54  
55  
56  
57  
58  
59  
60



## RESULTS

The responders were 321, from all 20 Italian regions, representing 13% of the 2.260 tenured Italian certified medical oncologists from the 319 Oncology Units of the country, according to the White Book of the Italian Association of Medical Oncology.<sup>27</sup> The respondent characteristics are summarized in Table 1. They reflect the main characteristics of the Italian population of oncologists, with the majority of them employed in northern Italy, having equal sex distribution, a third being aged 45 years or younger and working predominantly in public hospitals. However, there was a greater proportion of chiefs of staff because of the nature of the study sponsor.

The questionnaire and answers concerning the COI are described in Figure 1. Over two-thirds (68%) believe the majority of Italian oncologists have a COI with industry. A subgroup analysis indicates a greater proportion of them among females, younger physicians, assistant chiefs and those who did not receive payments from industry in the last 3 years ( $p<0.05$ , table 2). However, 59% assume the COI in oncology is no greater than in other medical specialties.

Overall, 62% declared general payments from the pharmaceutical industry in the last 3 years, with a significantly greater proportion among those living in southern Italy, males, oncologists working in research institutes and chiefs of staff ( $p<0.05$ , Table 3).

Eighty-one percent believe that most oncology education is supported by industry, with a greater proportion among older physicians and chiefs of staff ( $p<0.05$ ), while over 70% think their continuing medical education (CME) should be supported by their institution or public sources and only less than 10% and 20% think it should be paid for by themselves or the industry, respectively (Table 4). The vast majority stated their first CME tool is scientific journals (89%), but 14% use pharmaceutical representatives as their main CME source.

1  
2  
3 However, 54% of the medical oncologists consider it inappropriate to organize a scientific meeting  
4 within his/her facility with an opinion leader chosen by a pharmaceutical company, especially in the  
5 north and among the chiefs of staff ( $p<0.05$ ).  
6  
7  
8

9  
10 About 77% believe that the greater allocation of budget placed by industry on marketing and  
11 promotion relative to research and development is inappropriate, with a greater proportion of  
12 supporters among younger physicians and non-chiefs of staff ( $p<0.05$ ), but 75% of all respondents  
13 consider it appropriate to receive travel and lodging hospitality from industry to attend international  
14 meetings, with a significantly greater proportion of supporters among those receiving direct  
15 industry payments ( $p<0.05$ ).  
16  
17  
18  
19  
20  
21  
22

23 A median net profit margin of €5,000 (mean±SD=€9,888±10,414) per patient enrolled in a trial was  
24 considered an appropriate amount for the investigator's institution, although the distribution had a  
25 long tail towards higher values.  
26  
27  
28  
29

30  
31 Sixty percent would agree to receive a personal fee for each patient enrolled in an industry  
32 sponsored trial, with a greater proportion among those who received payments from industry  
33 ( $p<0.05$ ), but 79% state this should be reported in the patient's informed consent.  
34  
35  
36  
37

38 Nearly 60% think that disclosing a COI with different companies who are competitors is not a  
39 guarantee of impartiality and 71% believe that COI disclosure does not attenuate the risk of  
40 scientific bias. However, 48% of those working in private institutions *versus* 27% of those working  
41 in public institutions believe that COI disclosure attenuates the problem ( $p<0.05$ ).  
42  
43  
44  
45  
46

47 Over 90% believe that scientific societies should have a COI policy and that a detailed report of the  
48 financial support by the industry should be published annually. A total of 58% believe that industry  
49 support does not influence topic selection in meetings and 61% believe that giving an invited  
50 speech by industry does not influence their drug prescription. However, a higher proportion of male  
51 and older physicians feel that prescription is influenced by direct industry payments ( $p<0.05$ ).  
52  
53  
54  
55  
56  
57  
58

1  
2  
3 Finally, 79% consider it unfair to be co-author of an article written by a medical writer for an  
4 industry-sponsored trial when no substantial scientific contribution is made. However, 25% of those  
5 receiving industry payments believe this is appropriate *versus* 15% of those who did not ( $p<0.05$ ).  
6  
7  
8  
9

## 10 11 12 13 **DISCUSSION**

14  
15  
16 With the introduction of the open Physician Payments Sunshine Act and the increasing costs of  
17 healthcare, the debate on financial COI has received a great deal of attention in the USA.<sup>1,24,25,28</sup>  
18  
19 Particularly in Europe, however, a direct perspective by the medical community on this matter is  
20 still unclear.  
21  
22  
23

24  
25 The main findings from this anonymous questionnaire indicate that two-thirds of Italian medical  
26 oncologists believe that COI is a relevant issue, with a higher perception among females, young  
27 physicians, assistant chiefs of staff and those not receiving industry payments in the last three years.  
28  
29 Although nearly 60% suppose this is not a greater issue in oncology than in other medical  
30 specialties, this does not mitigate the potential impact of the problem. Secondly, 62% of the sample  
31 declared direct payments from the pharmaceutical industry in the last three years, with a greater  
32 frequency in southern Italy, research hospitals, chiefs of staff and male physicians.  
33  
34  
35  
36  
37  
38  
39

40  
41 Over 80% confirm that most oncology education and training is financially supported by industry,  
42 with a greater proportion of followers among older physicians and chiefs. Subgroup analyses also  
43 show there is a greater awareness of COI as a problem among women and young doctors, who are  
44 also among those categories receiving fewer payments from industry. While it is difficult to  
45 establish a causal relationship between increased awareness and lower frequency of payments (the  
46 younger and female physicians groups might have a more idealistic attitude), the gender disparity in  
47 industry relationships is a well-known phenomenon. In recent American analyses, only one-quarter  
48 of physicians receiving payments were female, who, on average, also received less money per  
49  
50  
51  
52  
53  
54  
55  
56  
57  
58  
59  
60

1  
2  
3 person than men.<sup>29</sup> In our study, 70% of male *versus* 53% of female physicians received direct  
4  
5 payments from industry for speaking fees in the last 3 years. This percentage is in line with that  
6  
7 reported by a recent survey through the open payment act in the United States, where 63% of  
8  
9 oncologists received a general payment in 2014.<sup>30</sup> Oncologists were also more likely to receive a  
10  
11 general payment and to hold ownership interest compared with non-oncologists.<sup>30</sup>  
12

13  
14 Another important source of funding from industry is research. Interestingly, while 60% of  
15  
16 physicians would agree to receive a percentage fee for every patient enrolled in an industry-  
17  
18 sponsored trial, nearly 80% are favorable to disclose it in the patient's informed consent. This is a  
19  
20 significant inclination towards transparency among our professional community that has not yet  
21  
22 been translated in regulatory acts by the current legislation regulating clinical trials. This is also  
23  
24 important because physician payment for study participation in clinical trials is a potential COI that  
25  
26 can adversely affect patient trust.<sup>10,31</sup>  
27  
28  
29

30  
31 The median net margin for the employee institution that was considered balanced for each patient  
32  
33 enrolled in an industry trial was €5,000, which appears significantly lower than the current level of  
34  
35 industry per-patient fee, where the gross fee may now easily exceed €30,000. The vast majority of  
36  
37 respondents is also contrary to the current escalating trend to spend more for marketing and  
38  
39 promotion than for research and development by industry, a notion which is rarely openly declared  
40  
41 by industry.<sup>15,16</sup> These considerations suggest that the surveyed sample is aware that the current  
42  
43 trend to increasing costs also has a negative impact on quality of care once the drug is licensed. In  
44  
45 the United States, cancer patients carry rising burdens of healthcare-related out-of-pocket expenses,  
46  
47 and a growing number of patients are considered underinsured. To save money, a large proportion  
48  
49 of these patients take less or nothing of the prescribed medications, a phenomenon known as  
50  
51 financial toxicity, which has also been described in the context of the Italian healthcare system.<sup>19,32</sup>  
52  
53

54  
55 Nearly 80% consider it unfair be co-author of an article written by a medical writer for an industry-  
56  
57 sponsored trial when no substantial scientific contribution has been made. This is in contrast to the  
58

1  
2  
3 present trend of most industry-sponsored trials to be reported by medical writers, often in  
4 concomitance with presentation at premier international meetings.<sup>11</sup> The legal and ethical  
5 consequences of ghost writing, including risk of plagiarism and loss of professionalism and genuine  
6 intellectual contribution to the advancement of science, is a subject of intense debate<sup>33,34</sup>  
7  
8  
9

10  
11  
12 Over 70% of the oncologists think their CME should be supported by their institution or public  
13 sources and less than 10% by personal resources. The vast majority stated their first CME tool is  
14 scientific journals but nearly 15% use industry sales representatives as the main CME method.  
15  
16 These findings are in line with the public landscape of our national health system medical doctors,  
17 where CME is considered a right that should be covered by public resources and not a duty to be at  
18 least partially covered by physician resources. Three quarters of Italian oncologists would agree to  
19 be financially supported by industry for travel and lodging at international meetings, another  
20 important source of industry expenditures. It is possible that this form of financial support is  
21 perceived as less conflicting and as the only way to attend important meetings given the scarcity of  
22 public or private no-profit funding.  
23  
24  
25  
26  
27  
28  
29  
30  
31  
32  
33

34 Interestingly, over 70% believe that COI disclosure during presentations does not attenuate the risk  
35 of scientific bias. A recent study<sup>35</sup> also showed that disclosure can be incomplete by using the term  
36 of 'unpaid consultant', whereby many doctors fail to identify research funding, conference fees,  
37 travel expenses or other benefits. However, approximately 60% believe that industry support does  
38 not influence topic selection at meetings and that giving invited speeches does not influence  
39 personal drug prescription.  
40  
41  
42  
43  
44  
45  
46  
47

48 Another important issue raised by our survey is the call for a higher level of transparency by  
49 scientific societies, including annual detailed reporting of industry payments. Prior studies have  
50 shown that disclosure of COI among Italian scientific societies does not attenuate the problem but  
51 in fact seems to be a justification to increase financial relationships.<sup>26</sup>  
52  
53  
54  
55  
56  
57

1  
2  
3 The consequences of financial COI on patient perception has been the subject of recent studies.<sup>8,10,36</sup>  
4  
5 In an ASCO survey of COI policies, the majority of non-physicians and patient advocates felt that  
6  
7 full disclosure of COI by physicians was expected and could be a factor in patients' decisions  
8  
9 regarding therapy.<sup>37</sup>  
10

11  
12 Altogether, the answers to the survey clearly show that the direct economic relationship between  
13  
14 clinicians and industry is deeply rooted in current practice. Money from industry regularly flows as  
15  
16 the result of declared marketing investments in the context of legal pathways. The hidden question  
17  
18 is whether a clinician who receives financial support for various activities in his profession can be  
19  
20 impartial and objective in making clinical decisions. This is particularly true in all those clinical  
21  
22 settings where uncertainties about the added value of new drugs make treatment choices  
23  
24 questionable.<sup>17,18,20-22</sup> Most recent evidence indicates that the majority of cancer drugs registered in  
25  
26 Europe by EMA do not show a benefit in term of survival or quality of life<sup>38</sup>, indicating the  
27  
28 necessity to raise the evidence bar before market approval<sup>39</sup>. Moreover, in a recent analysis of 10  
29  
30 approved cancer drugs in the United States, the median cost of developing a drug was  
31  
32 \$648,000,000, a figure significantly lower than prior estimates. The revenue after four years of  
33  
34 approval was substantial (median, \$1658.4 million; range, \$204.1 million to \$22 275.0 million)<sup>40</sup>,  
35  
36 suggesting the need for a significant reduction of expenses for marketing and promotional activities,  
37  
38 including paying doctors for a variety of activities, to guarantee sustainable health systems. The  
39  
40 results of our study are also consistent with the international research context on this topic<sup>2-7</sup>,  
41  
42 underlying the increasing importance of COI on practice<sup>41</sup> and research<sup>42</sup>.  
43  
44  
45  
46

47  
48 To our knowledge this is the first national survey performed by Italian oncologists and one of the  
49  
50 few prompted by medical oncologists regarding their COI and physician-industry relationships. The  
51  
52 questionnaire in an anonymous form probably favored the disclosure of financial relationships with  
53  
54 industry and an open attitude by respondents. The study has limitations, including the non-random  
55  
56 selection of the respondents and the greater representation of chiefs of staff. A strength of our study,  
57  
58  
59  
60

1  
2  
3 however, is the relatively large sample size which may overcome the limitations and possibly  
4  
5 reflect the general characteristics of medical oncologists in Italy.<sup>27</sup>  
6

7  
8 Our study indicates that among Italian oncologists COI is perceived as an important issue  
9  
10 influencing education, quality of care, science and costs. The overall view on COI calls for a  
11  
12 process of rethinking of the relationship between clinicians and industry and, most importantly, a  
13  
14 courageous step toward transparency. The results seem to indicate a need for education about the  
15  
16 effect of sponsored education on attitudes and on prescribing behaviour and the extent to which  
17  
18 industry sponsorship affects clinical trial results. However, disclosure cannot be the only answer  
19  
20 and all components of the healthcare system are called into action. Health institutions should  
21  
22 promote and finance professional education and industry should transparently contribute to research  
23  
24 and increase quality of care. Most importantly, we suggest that the financial relationships between  
25  
26 industry and clinicians should always be mediated by the employee's institution. In the present  
27  
28 context of increasing health care costs and financial toxicity, alternative ways to support education  
29  
30 and research and strict transparency policies could contribute to increased patient trust,  
31  
32 sustainability and equity in health care access. These principles are being proposed in a forthcoming  
33  
34 policy document on COI that will be endorsed by CIPOMO, spread among all Italian oncologists,  
35  
36 and proposed to the Italian health authorities.  
37  
38  
39  
40  
41  
42  
43  
44  
45  
46  
47  
48  
49  
50  
51  
52  
53  
54  
55  
56  
57  
58  
59  
60

Table 1. Main respondent characteristics

|                                                     | <i>No. (%)</i> |
|-----------------------------------------------------|----------------|
| Geographic Area                                     |                |
| North                                               | 161 (50.2%)    |
| Center                                              | 108 (33.6%)    |
| South                                               | 52 (16.2%)     |
| Age in years                                        |                |
| < 45                                                | 103 (32.1%)    |
| 45 - 59                                             | 133 (41.4%)    |
| ≥ 60                                                | 85 (26.5%)     |
| Sex*                                                |                |
| Male                                                | 170 (53.3%)    |
| Female                                              | 149 (46.7%)    |
| Place of Work                                       |                |
| Hospital                                            | 283 (88.2%)    |
| University                                          | 20 (6.2%)      |
| Research Institute                                  | 11 (3.4%)      |
| Other                                               | 7 (2.2%)       |
| Nature of Institution                               |                |
| Public                                              | 296 (92.2%)    |
| Private                                             | 25 (7.8%)      |
| Job Position                                        |                |
| Assistant Chief                                     | 190 (59.2%)    |
| Chief                                               | 98 (30.5%)     |
| Other                                               | 33 (10.3%)     |
| Years of Experience                                 |                |
| <15                                                 | 88 (27.4%)     |
| ≥15                                                 | 233 (72.6%)    |
| Direct payment from industries in the last 3 years* |                |
| No                                                  | 120 (37.6%)    |
| Yes                                                 | 199 (62.4%)    |

\*Two oncologists did not answer the question



Table 2. Subgroup analysis on question # 1: Do you believe most oncologists have direct conflict of interests with pharmaceutical companies?

|                                      | Disagree |      | Agree |      | <i>P</i> < * |
|--------------------------------------|----------|------|-------|------|--------------|
|                                      | no.      | %    | no.   | %    |              |
| <b>Country area</b>                  |          |      |       |      |              |
| North                                | 112      | 69.6 | 49    | 30.4 | 0.440        |
| Center                               | 68       | 63.0 | 40    | 37.0 |              |
| South                                | 37       | 71.2 | 15    | 28.8 |              |
| <b>Sex</b>                           |          |      |       |      | <b>0.001</b> |
| F                                    | 84       | 56.4 | 65    | 43.6 |              |
| M                                    | 131      | 77.1 | 39    | 22.9 |              |
| <b>Age</b>                           |          |      |       |      | 0.057        |
| < 45                                 | 61       | 59.2 | 42    | 40.8 |              |
| 45 — 59                              | 92       | 69.2 | 41    | 30.8 |              |
| ≥ 60                                 | 64       | 75.3 | 21    | 24.7 |              |
| <b>Workplace</b>                     |          |      |       |      | 0.583        |
| Research Institute                   | 9        | 81.8 | 2     | 18.2 |              |
| Hospital                             | 189      | 66.8 | 94    | 33.2 |              |
| University                           | 15       | 75.0 | 5     | 25.0 |              |
| Other                                | 4        | 57.1 | 3     | 42.9 |              |
| <b>Type of structure</b>             |          |      |       |      | 0.350        |
| Private                              | 19       | 76.0 | 6     | 24.0 |              |
| Public                               | 198      | 66.9 | 98    | 33.1 |              |
| <b>Job position</b>                  |          |      |       |      | <b>0.021</b> |
| Assistant chief                      | 119      | 62.6 | 71    | 37.4 |              |
| Chief                                | 77       | 78.6 | 21    | 21.4 |              |
| Other                                | 21       | 63.6 | 12    | 36.4 |              |
| <b>Years of experience</b>           |          |      |       |      | <b>0.023</b> |
| < 15                                 | 51       | 58.0 | 37    | 42.0 |              |
| ≥ 15                                 | 166      | 71.2 | 67    | 28.8 |              |
| <b>Direct payments from industry</b> |          |      |       |      | <b>0.029</b> |
| No                                   | 72       | 60.0 | 48    | 40.0 |              |
| Yes                                  | 143      | 71.9 | 56    | 28.1 |              |

\*Referred to bidirectional chi-square test

Table 3. Subgroup analysis on the question: “Have you received any payment to speak at educational meetings sponsored by a pharmaceutical company in the last 3 years?”

|                            | <i>No</i> |      | <i>Yes</i> |       | <i>P</i> < * |
|----------------------------|-----------|------|------------|-------|--------------|
|                            | no.       | %    | no.        | %     |              |
| <b>Country area</b>        |           |      |            |       | <b>0.002</b> |
| North                      | 57        | 35.4 | 104        | 64.6  |              |
| Center                     | 52        | 49.1 | 54         | 50.9  |              |
| South                      | 11        | 21.1 | 41         | 78.9  |              |
| <b>Sex</b>                 |           |      |            |       | <b>0.002</b> |
| F                          | 69        | 46.6 | 79         | 53.4  |              |
| M                          | 51        | 30.0 | 119        | 70.0  |              |
| <b>Age</b>                 |           |      |            |       | 0.715        |
| < 45                       | 41        | 39.8 | 62         | 60.2  |              |
| 45 — 59                    | 50        | 38.2 | 81         | 61.8  |              |
| ≥ 60                       | 29        | 34.1 | 56         | 65.8  |              |
| <b>Workplace</b>           |           |      |            |       | <b>0.003</b> |
| Research Institute         | 0         | 0.0  | 11         | 100.0 |              |
| Hospital                   | 106       | 37.6 | 176        | 62.4  |              |
| University                 | 8         | 42.1 | 11         | 57.9  |              |
| Other                      | 6         | 85.7 | 1          | 14.3  |              |
| <b>Type of structure</b>   |           |      |            |       | 0.493        |
| Private                    | 11        | 44.0 | 14         | 56.0  |              |
| Public                     | 109       | 37.1 | 185        | 62.9  |              |
| <b>Job position</b>        |           |      |            |       | <b>0.016</b> |
| Assistant chief            | 72        | 38.3 | 116        | 61.7  |              |
| Chief                      | 29        | 29.6 | 69         | 70.4  |              |
| Other                      | 19        | 57.6 | 14         | 42.4  |              |
| <b>Years of experience</b> |           |      |            |       | 0.314        |
| < 15                       | 37        | 42.0 | 51         | 58.0  |              |
| ≥ 15                       | 83        | 35.9 | 148        | 64.1  |              |

\*Referred to bidirectional chi-square test

Table 4. Role of public entities and private industry in continuing medical education (CME) support.

|                                                                                                                                                                                                                                                                                                                               | <b>No. of important or very important score 4+5 (%)</b>                                                   |
|-------------------------------------------------------------------------------------------------------------------------------------------------------------------------------------------------------------------------------------------------------------------------------------------------------------------------------|-----------------------------------------------------------------------------------------------------------|
| <b>Questions</b>                                                                                                                                                                                                                                                                                                              |                                                                                                           |
| <p>1. Which method do you primarily use for your CME? You can select multiple choices and attribute different scores from “not at all important” (1) to “very important” (5).</p> <p>Medical websites</p> <p>Scientific journals</p> <p>CME courses</p> <p>Conferences</p> <p>Pharmaceutical representatives</p> <p>Books</p> | <p>185 (60.8)</p> <p>278 (89.1)</p> <p>181 (59.5)</p> <p>211 (67.4)</p> <p>42 (13.7)</p> <p>62 (20.9)</p> |
| <p>2. Who should pay for your CME? You can select multiple choices and attribute different scores from “not at all important” (1) to “very important” (5).</p> <p>- Myself</p> <p>- Hospital</p> <p>- Public Institutions</p> <p>- Pharmaceutical companies</p> <p>- Research Foundations</p>                                 | <p>27 (9.3)</p> <p>256 (83.1)</p> <p>211 (70.3)</p> <p>51 (17.3)</p> <p>140 (48.1)</p>                    |

1  
2  
3 Figure Legend. Figure 1: Questions and answers evaluated with a 4-point Likert scale on CoI (%)  
4  
5  
6  
7  
8  
9  
10  
11  
12  
13  
14  
15  
16  
17  
18  
19  
20  
21  
22  
23  
24  
25  
26  
27  
28  
29  
30  
31  
32  
33  
34  
35  
36  
37  
38  
39  
40  
41  
42  
43  
44  
45  
46  
47  
48  
49  
50  
51  
52  
53  
54  
55  
56  
57  
58  
59  
60

For peer review only

## ACKNOWLEDGMENT

The Authors wish to thank Katherine Brandt for reviewing the English and Cristina Giua and Tania Buttiron Webber for technical assistance.

### Contributors

ADC, GN, FR: idea, planning data set, data analysis, wrote the manuscript, final approval of the version to be published.

EB, BR, VL: planning data set, statistical analysis, wrote the manuscript, final approval of the version to be published.

FA, LF, CV: revision of the manuscript for important intellectual content, final approval of the version to be published.

MT, MC: revision of the manuscript for important intellectual content, standing funding, final approval of the version to be published.

All authors: Agreed to be accountable for all aspects of the work in ensuring that questions related to the accuracy or integrity of any part of the work are appropriately investigated and resolved.

**Competing interests:** none

**Ethics approval:** not applicable

**Provenance and peer review:** not commissioned; externally peer reviewed.

**Data sharing statement:** All data are stored in the server of CIPOMO and are available on request.

**REFERENCES**

1. Stead WW. The Complex and Multifaceted Aspects of Conflicts of Interest. *JAMA*.2017;317(17):1765-1767.
2. McCarthy M. PubMed is urged to include competing interest information in abstracts. *BMJ*. 2016 Apr 7;353:i2018. doi: 10.1136/bmj.i2018. PubMed PMID: 27056448.
3. McCarthy M. US doctors earn speaking and consulting fees from drug companies that sponsor their research. *BMJ*. 2014 Mar 27;348:g2410. doi: 10.1136/bmj.g2410. PubMed PMID: 24677695.
4. Lundh A, Lexchin J, Mintzes B, Schroll JB, Bero L. Industry sponsorship and research outcome. *Cochrane Database Syst Rev*. 2017. 2017 Feb 16;2:MROOOO33.
5. Ahn R, Woodbridge A, Abraham A et al. Financial ties of principal investigators and randomized controlled trial outcomes: cross sectional study. *BMJ*. 2017 Jan 17;356:i6770. doi: 10.1136/bmj.i6770. PubMed PMID: 28096109; PubMed Central PMCID: PMC5241252.
6. Mitchell AP, Basch EM, Dusetzina SB. Financial Relationships With Industry Among National Comprehensive Cancer Network Guideline Authors. *JAMA Oncol*. 2016; 2(12):1628-1631.
7. Wise J. Still too little transparency among guideline writers and others. *BMJ*. 2017 Jan 17;356:j276. doi: 10.1136/bmj.j276. PubMed PMID: 28096172.
8. Hampson LA, Agrawal M, Joffe S, Gross CP, Verter J, Emanuel EJ. Patients' views on financial conflicts of interest in cancer research trials. *N Engl J Med*. 2006;355(22):2330-7.
9. Holbrook A, Lexchin J, Pullenayegum E et al. What do Canadians think about physician-pharmaceutical industry interactions? *Health Policy*. 2013;112(3):255-63.
10. Klein E, Solomon AJ, Corboy J, Bernat J. Physician compensation for industry-sponsored clinical trials in multiple sclerosis influences patient trust. *Mult Scler Relat Disord*. 2016;8:4-8.
11. Moy B, Bradbury AR, Helft PR, Egleston BL, Sheikh-Salah M, Peppercorn J. Correlation between financial relationships with commercial interests and research prominence at an oncology meeting. *J Clin Oncol*. 2013 Jul 20;31(21):2678-84.

- 1  
2  
3 12. Lundh A, Barbateskovic M, Hróbjartsson A, Gøtzsche PC. Conflicts of interest at medical journals:  
4 the influence of industry-supported randomised trials on journal impact factors and revenue - cohort  
5 study. PLoS Med. 2010 Oct 26;7(10):e1000354. Erratum in: PLoS Med. 2011 Feb;8(2).  
6  
7  
8
- 9 13. Global Oncology Trend Report a Review of 2015 and Outlook to 2020. IMS Institute for healthcare  
10 information. [http://www.imshealth.com/en/thought-leadership/quintilesims-institute/reports/global-](http://www.imshealth.com/en/thought-leadership/quintilesims-institute/reports/global-oncology-trend-report-a-review-of-2015-and-outlook-to-2020)  
11 [oncology-trend-report-a-review-of-2015-and-outlook-to-2020](http://www.imshealth.com/en/thought-leadership/quintilesims-institute/reports/global-oncology-trend-report-a-review-of-2015-and-outlook-to-2020).  
12  
13  
14
- 15 14. Saltz LB. Perspectives on Cost and Value in Cancer Care. JAMA Oncol. 2016;2(1):19-21.  
16
- 17 15. Laurance J. Makers of anticancer drugs are "profiteering," say 100 specialists from around the world.  
18 BMJ. 2013;346:f2810  
19
- 20 16. Anderson R. Pharmaceutical industry gets high on fat profits. By Business reporter, BBC News 6  
21 November 2014. <http://www.bbc.com/news/business-28212223>  
22  
23
- 24 17. Cressman S, Browman GP, Hoch JS, Kovacic L, Peacock SJ. A Time-Trend Economic Analysis of  
25 Cancer Drug Trials. Oncologist. 2015;20(7):729-36.  
26  
27
- 28 18. Mailankody S, Prasad V. Five Years of Cancer Drug Approvals: Innovation, Efficacy, and Costs.  
29 JAMA Oncol. 2015;1(4):539-40. Erratum in: JAMA Oncol. 2015 Jul;1(4):544.  
30  
31
- 32 19. Zafar SY, Peppercorn JM, Schrag D et al. The financial toxicity of cancer treatment: a pilot study  
33 assessing out-of-pocket expenses and the insured cancer patient's experience. Oncologist.  
34 2013;18(4):381-90.  
35  
36  
37
- 38 20. Kantarjian HM, Fojo T, Mathisen M, Zwelling LA. Cancer drugs in the United States: Justum  
39 Pretium--the just price. J Clin Oncol. 2013;31(28):3600-4. Erratum in: J Clin Oncol.  
40 2015;33(30):3523.  
41  
42
- 43 21. Pfister DG. The just price of cancer drugs and the growing cost of cancer care: oncologists need to  
44 be part of the solution. J Clin Oncol. 2013;31(28):3487-9.  
45  
46  
47
- 48 22. Fricker J. New NICE criteria for drug access. Lancet Oncol. 2017;18(5):576.  
49
- 50 23. Jimenez J. Why the Approach to Drug Pricing Has to Change Now. 2016.  
51 [https://www.forbes.com/sites/sciencebiz/2016/11/01/why-the-approach-to-drug-pricing-has-to-](https://www.forbes.com/sites/sciencebiz/2016/11/01/why-the-approach-to-drug-pricing-has-to-change-now/#62f0330657fc)  
52 [change-now/#62f0330657fc](https://www.forbes.com/sites/sciencebiz/2016/11/01/why-the-approach-to-drug-pricing-has-to-change-now/#62f0330657fc).  
53  
54  
55  
56  
57

- 1  
2  
3 24. Chimonas S, DeVito NJ, Rothman DJ. Bringing Transparency to Medicine: Exploring Physicians'  
4 Views and Experiences of the Sunshine Act. *Am J Bioeth.* 2017;17(6):4-18.  
5  
6  
7 25. Lenzer J, Brownlee S. Diverting attention from financial conflicts of interest. *BMJ.* 2015 Jun  
8 30;350:h3505. doi: 10.1136/bmj.h3505. PubMed PMID: 26129927.  
9  
10  
11 26. Fabbri A, Gregoraci G, Tedesco D et al. Conflict of interest between professional medical societies  
12 and industry: a cross-sectional study of Italian medical societies' websites. *BMJ Open.*  
13 2016.1;6(6):e011124. Erratum in: *BMJ Open.* 2016;6(6):e011124corr1.  
14  
15  
16 27. Libro bianco VI edizione. Milan, Italy: Associazione Italiana di Oncologia Medica; 2015.  
17 [http://www.aiom.it/libro-bianco-2015/professionisti/documenti-scientifici/pubblicazioni/libro-  
19 bianco-2015/libro-bianco-2015/1,759,1](http://www.aiom.it/libro-bianco-2015/professionisti/documenti-scientifici/pubblicazioni/libro-<br/>18 bianco-2015/libro-bianco-2015/1,759,1)  
20  
21  
22 28. Rose SL, Krzyzanowska MK, Joffe S. Relationships between authorship contributions and authors'  
23 industry financial ties among oncology clinical trials. *J Clin Oncol.* 2010 Mar 10;28(8):1316-21.  
24  
25  
26 29. Tringale KR, Marshall D, Mackey TK, Connor M, Murphy JD, Hattangadi-Gluth JA. Types and  
27 Distribution of Payments From Industry to Physicians in 2015. *JAMA.* 2017;317(17):1774-1784.  
28  
29  
30 30. Marshall DC, Moy B, Jackson ME, Mackey TK, Hattangadi-Gluth JA. Distribution and Patterns of  
31 Industry-Related Payments to Oncologists in 2014. *J Natl Cancer Inst.* 2016;108(12).  
32  
33  
34 31. Wen L. Patients can't trust doctors' advice if we hide our financial connections with drug companies.  
35 *BMJ.* 2014 Jan 15;348:g167. doi: 10.1136/bmj.g167. Review. PubMed PMID: 24430529.  
36  
37  
38 32. Perrone F, Jommi C, Di Maio M et al. The association of financial difficulties with clinical outcomes  
39 in cancer patients: secondary analysis of 16 academic prospective clinical trials conducted in Italy.  
40 *Ann Oncol.* 2016Dec;27(12):2224-2229. doi: 10.1093/annonc/mdw433.  
41  
42  
43 33. Das N, Panjabi M. Plagiarism: Why is it such a big issue for medical writers? Perspectives in  
44 *Clinical Research.* 2011;2(2):67-71.  
45  
46  
47 34. Wislar JS, Flanagin A, Fontanarosa PB, Deangelis CD. Honorary and ghost authorship in high  
48 impact biomedical journals: a cross sectional survey. *BMJ.* 2011;343:d6128.  
49  
50  
51 35. Menkes DB, Masters JD, Bröring A, Blum A. What Does 'Unpaid Consultant' Signify? A Survey of  
52 Euphemistic Language in Conflict of Interest Declarations. *J Gen Intern Med.* 2018; 33(2):139-141.  
53  
54  
55  
56  
57  
58  
59  
60



- 1  
2  
3 36. Wong YN, Schluchter MD, Albrecht TL et al. Financial Concerns About Participation in Clinical  
4  
5 Trials Among Patients With Cancer. *J Clin Oncol*. 2016 Feb 10;34(5):479-87.
- 6  
7 37. Lockhart AC, Brose MS, Kim ES et al. Physician and stakeholder perceptions of conflict of interest  
8  
9 policies in oncology. *J Clin Oncol*. 2013;31(13):1677-82.
- 10  
11 38. Davis C, Naci H, Gurpinar E, Poplavska E, Pinto A, Aggarwal A. Availability of evidence of  
12  
13 benefits on overall survival and quality of life of cancer drugs approved by European Medicines  
14  
15 Agency: retrospective cohort study of drug approvals 2009-13. *BMJ*. 2017 Oct 4;359:j4530.
- 16  
17 39. Cohen D. Cancer drugs: high price, uncertain value. *BMJ*. 2017 Oct 4;359:j4543. doi:  
18  
19 10.1136/bmj.j4543.
- 20  
21 40. Prasad V, Mailankody S. Research and Development Spending to Bring a Single Cancer Drug to  
22  
23 Market and Revenues After Approval. *JAMA Intern Med*. 2017 Sep 11. doi:  
24  
25 10.1001/jamainternmed.2017.3601
- 26  
27 41. Campbell EG, Gruen RL, Mountford J, Miller LG, Cleary PD, Blumenthal D. A national survey of  
28  
29 physician-industry relationships. *N Engl J Med*. 2007 Apr 26;356(17):1742-50.
- 30  
31 42. Rasmussen K, Schroll J, Götzsche PC, Lundh A. Under-reporting of conflicts of interest among  
32  
33 trialists: a cross-sectional study. *J R Soc Med*. 2015;108(3):101-7
- 34  
35  
36  
37  
38  
39  
40  
41  
42  
43  
44  
45  
46  
47  
48  
49  
50  
51  
52  
53  
54  
55  
56  
57  
58  
59  
60

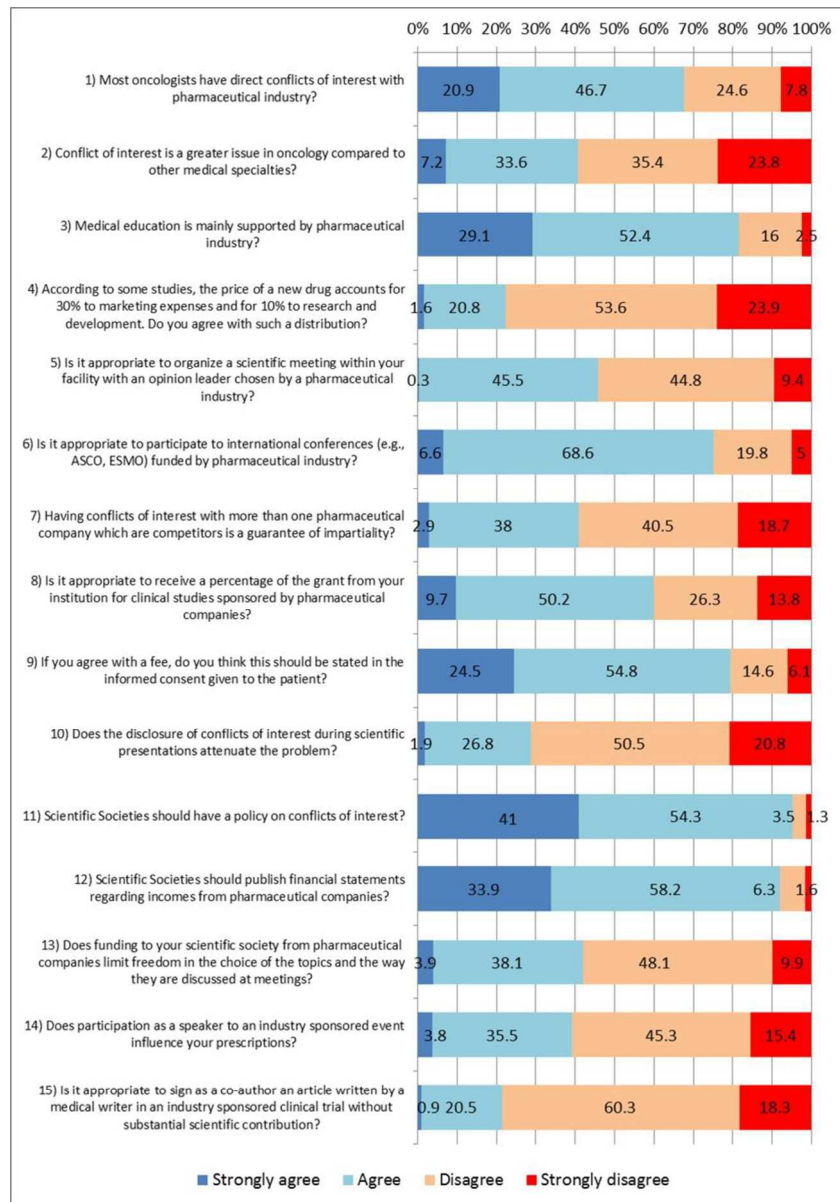

Figure 1: Questions and answers evaluated with a 4-point Likert scale on CoI (%)

106x151mm (300 x 300 DPI)

STROBE Statement—Checklist of items that should be included in reports of *cross-sectional studies*

|                              | Item No | Recommendation                                                                                                                                                                                                                                                                                                                             |
|------------------------------|---------|--------------------------------------------------------------------------------------------------------------------------------------------------------------------------------------------------------------------------------------------------------------------------------------------------------------------------------------------|
| <b>Title and abstract</b>    | 1       | (a) Indicate the study's design with a commonly used term in the title or the abstract<br><b>AU: Added in the abstract</b>                                                                                                                                                                                                                 |
|                              |         | (b) Provide in the abstract an informative and balanced summary of what was done and what was found<br><b>AU: OK</b>                                                                                                                                                                                                                       |
| <b>Introduction</b>          |         |                                                                                                                                                                                                                                                                                                                                            |
| Background/rationale         | 2       | Explain the scientific background and rationale for the investigation being reported<br><b>AU: OK, pages 5-6</b>                                                                                                                                                                                                                           |
| Objectives                   | 3       | State specific objectives, including any prespecified hypotheses<br><b>AU: added in the method section, page 7</b>                                                                                                                                                                                                                         |
| <b>Methods</b>               |         |                                                                                                                                                                                                                                                                                                                                            |
| Study design                 | 4       | Present key elements of study design early in the paper<br><b>AU: OK page 6-7</b>                                                                                                                                                                                                                                                          |
| Setting                      | 5       | Describe the setting, locations, and relevant dates, including periods of recruitment, exposure, follow-up, and data collection<br><b>AU: OK page 6-7</b>                                                                                                                                                                                  |
| Participants                 | 6       | Give the eligibility criteria, and the sources and methods of selection of participants<br><b>AU: OK page 6-7</b>                                                                                                                                                                                                                          |
| Variables                    | 7       | Clearly define all outcomes, exposures, predictors, potential confounders, and effect modifiers. Give diagnostic criteria, if applicable<br><b>AU: OK page 6-8</b>                                                                                                                                                                         |
| Data sources/<br>measurement | 8*      | For each variable of interest, give sources of data and details of methods of assessment (measurement). Describe comparability of assessment methods if there is more than one group<br><b>AU: OK page 6-8</b>                                                                                                                             |
| Bias                         | 9       | Describe any efforts to address potential sources of bias<br><b>AU: OK page 8</b>                                                                                                                                                                                                                                                          |
| Study size                   | 10      | Explain how the study size was arrived at<br><b>AU: added on page 8</b>                                                                                                                                                                                                                                                                    |
| Quantitative variables       | 11      | Explain how quantitative variables were handled in the analyses. If applicable, describe which groupings were chosen and why<br><b>AU: OK page 8</b>                                                                                                                                                                                       |
| Statistical methods          | 12      | (a) Describe all statistical methods, including those used to control for confounding<br>(b) Describe any methods used to examine subgroups and interactions<br>(c) Explain how missing data were addressed<br>(d) If applicable, describe analytical methods taking account of sampling strategy<br>(e) Describe any sensitivity analyses |
| <b>Results</b>               |         |                                                                                                                                                                                                                                                                                                                                            |
| Participants                 | 13*     | (a) Report numbers of individuals at each stage of study—eg numbers potentially eligible, examined for eligibility, confirmed eligible, included in the study, completing follow-up, and analysed<br><b>AU: OK page 8-9</b>                                                                                                                |
|                              |         | (b) Give reasons for non-participation at each stage                                                                                                                                                                                                                                                                                       |
|                              |         | (c) Consider use of a flow diagram                                                                                                                                                                                                                                                                                                         |

|                                                                                              |                                                 |     |                                                                                                                                                                                                                                                                                                                                                                                                                           |
|----------------------------------------------------------------------------------------------|-------------------------------------------------|-----|---------------------------------------------------------------------------------------------------------------------------------------------------------------------------------------------------------------------------------------------------------------------------------------------------------------------------------------------------------------------------------------------------------------------------|
| 1<br>2<br>3<br>4<br>5<br>6<br>7                                                              | Descriptive data<br><b>AU: OK page 8-9</b>      | 14* | (a) Give characteristics of study participants (eg demographic, clinical, social) and information on exposures and potential confounders<br><hr/> (b) Indicate number of participants with missing data for each variable of interest                                                                                                                                                                                     |
| 8<br>9<br>10<br>11<br>12<br>13<br>14                                                         | Outcome data<br><b>AU: OK page 9-10</b>         | 15* | Report numbers of outcome events or summary measures                                                                                                                                                                                                                                                                                                                                                                      |
| 15<br>16<br>17                                                                               | Main results<br><b>AU: OK page 9-10</b>         | 16  | (a) Give unadjusted estimates and, if applicable, confounder-adjusted estimates and their precision (eg, 95% confidence interval). Make clear which confounders were adjusted for and why they were included<br><hr/> (b) Report category boundaries when continuous variables were categorized<br><hr/> (c) If relevant, consider translating estimates of relative risk into absolute risk for a meaningful time period |
| 18<br>19<br>20<br>21<br>22<br>23<br>24                                                       | Other analyses<br><b>AU: OK page 9-10</b>       | 17  | Report other analyses done—eg analyses of subgroups and interactions, and sensitivity analyses                                                                                                                                                                                                                                                                                                                            |
| 25<br>26<br>27<br>28<br>29<br>30                                                             | <b>Discussion</b>                               |     |                                                                                                                                                                                                                                                                                                                                                                                                                           |
| 31<br>32<br>33<br>34                                                                         | Key results<br><b>AU: OK page 10-11</b>         | 18  | Summarise key results with reference to study objectives                                                                                                                                                                                                                                                                                                                                                                  |
| 35<br>36<br>37                                                                               | Limitation<br><b>AU: OK page 4 and 14</b>       | 19  | Discuss limitations of the study, taking into account sources of potential bias or imprecision. Discuss both direction and magnitude of any potential bias                                                                                                                                                                                                                                                                |
| 38<br>39<br>40<br>41<br>42<br>43<br>44                                                       | Interpretation<br><b>AU: OK page 10-14</b>      | 20  | Give a cautious overall interpretation of results considering objectives, limitations, multiplicity of analyses, results from similar studies, and other relevant evidence                                                                                                                                                                                                                                                |
| 45<br>46<br>47<br>48<br>49<br>50<br>51<br>52<br>53<br>54<br>55<br>56<br>57<br>58<br>59<br>60 | Generalisability<br><b>AU: OK page 4 and 14</b> | 21  | Discuss the generalisability (external validity) of the study results                                                                                                                                                                                                                                                                                                                                                     |
|                                                                                              | <b>Other information</b>                        |     |                                                                                                                                                                                                                                                                                                                                                                                                                           |
|                                                                                              | Funding<br><b>AU: OK title page</b>             | 22  | Give the source of funding and the role of the funders for the present study and, if applicable, for the original study on which the present article is based                                                                                                                                                                                                                                                             |

\*Give information separately for exposed and unexposed groups.

**Note:** An Explanation and Elaboration article discusses each checklist item and gives methodological background and published examples of transparent reporting. The STROBE checklist is best used in conjunction with this article (freely available on the Web sites of PLoS Medicine at <http://www.plosmedicine.org/>, Annals of Internal Medicine at <http://www.annals.org/>, and Epidemiology at <http://www.epidem.com/>). Information on the STROBE Initiative is available at [www.strobe-statement.org](http://www.strobe-statement.org).
